1  
2  
3  
4  
5  
6  
7  
8  
9  
10  
11  
12  
13  
14  
15  
16  
17  
18

## Mapping Cognitive Brain Functions at Scale

Pragathi Priyadharsini Balasubramani<sup>1</sup>, Alejandro Ojeda<sup>1</sup>, Gillian Grennan<sup>1</sup>, Vojislav Maric<sup>1</sup>, Hortense Le<sup>1</sup>, Fahad Alim<sup>1</sup>, Mariam Zafar-Khan<sup>1</sup>, Juan Diaz-Delgado<sup>1</sup>, Sarita Silveira<sup>1</sup>, Dhakshin Ramanathan<sup>1,2</sup>,  
Jyoti Mishra<sup>1</sup>

<sup>1</sup>Neural Engineering and Translation Labs, Department of Psychiatry, University of California, San Diego, La Jolla, CA, USA

<sup>2</sup>Department of Mental Health, VA San Diego Medical Center, San Diego, CA

Correspondence should be addressed to:

Pragathi Priyadharsini Balasubramani & Jyoti Mishra

University of California, San Diego

Neural Engineering & Translation Labs (NEAT Labs)

9500 Gilman Drive Mail Code 0875

La Jolla, CA 92037

[pbalasubramani@health.ucsd.edu](mailto:pbalasubramani@health.ucsd.edu) & [jymishra@health.ucsd.edu](mailto:jymishra@health.ucsd.edu)

## 19 Abstract

20 A fundamental set of cognitive abilities enable humans to efficiently process goal-relevant  
21 information, suppress irrelevant distractions, maintain information in working memory, and act flexibly  
22 in different behavioral contexts. Yet, studies of human cognition and their underlying neural mechanisms  
23 usually evaluate these cognitive constructs in silos, instead of comprehensively in-tandem within the  
24 same individual. Here, we developed a scalable, mobile platform, “*BrainE*” (short for Brain  
25 Engagement), to rapidly assay several essential aspects of cognition simultaneous with wireless  
26 electroencephalography (EEG) recordings. Using *BrainE*, we rapidly assessed five aspects of cognition  
27 including (1) selective attention, (2) response inhibition, (3) working memory, (4) flanker interference  
28 and (5) emotion interference processing, in 102 healthy young adults. We evaluated stimulus encoding  
29 in all tasks using the EEG neural recordings, and isolated the cortical sources of the spectrotemporal EEG  
30 dynamics. Additionally, we used *BrainE* in a two-visit study in 24 young adults to investigate the  
31 reliability of the neuro-cognitive data as well as its plasticity to transcranial magnetic stimulation (TMS).  
32 We found that stimulus encoding on multiple cognitive tasks could be rapidly assessed, identifying  
33 common as well as distinct task processes in both sensory and cognitive control brain regions. Event  
34 related synchronization (ERS) in the theta (3-7 Hz) and alpha (8-12 Hz) frequencies as well as event  
35 related desynchronization (ERD) in the beta frequencies (13-30 Hz) were distinctly observed in each  
36 task. The observed ERS/ERD effects were overall anticorrelated. The two-visit study confirmed high  
37 test-retest reliability for both cognitive and neural data, and neural responses showed specific TMS  
38 protocol driven modulation. We also show that the global cognitive neural responses are sensitive to  
39 mental health symptom self-reports. This first study with the *BrainE* platform showcases its utility in  
40 studying neuro-cognitive dynamics in a rapid and scalable fashion.

## 42 Highlights

- 43 • Rapid and scalable EEG recordings reveal common and distinct cortical activations across five core  
44 cognitive tasks.
- 45 • Data acquired across visits one-week-apart show high test-retest reliability for both cognitive and  
46 neural measurements.
- 47 • Evoked neural responses during emotion interference processing demonstrate specific short-term  
48 plasticity driven by type of neurostimulation.
- 49 • Cognitively evoked neural responses are sensitive to variations in mental health symptoms.

## 51 Introduction

52 Healthy brains are wired to effectively and efficiently process information. These complex systems  
53 simultaneously ensure stability as well as flexibility, and reflect an essential capacity to adapt to  
54 constantly changing environmental and motivational contexts. This dynamic ability of human brains  
55 requiring multiple interacting mental operations is referred to as cognitive control (Badre, 2011;  
56 Lenartowicz et al., 2010; Luna et al., 2015). Cognitive control operations fundamentally include abilities  
57 for stimulus encoding as well as online maintenance of goal-relevant information (Gazzaley and Nobre,  
58 2012), suppression of competing goal-irrelevant distractions and behaviors (Mishra *et al.*, 2013), and a  
59 continuous evaluation of the accuracy of selected actions based on feedback (Posner and Rothbart, 2009;  
60 van Noordt and Segalowitz, 2012). Much research to-date has focused on studying these individual  
61 component processes of cognitive control in isolation in select human population cohort studies. Yet,  
62 studies rarely evaluate these multiple essential cognitive operations within the same individual,  
63 particularly investigating their common and distinct underlying neural features. Thus, there is a gap in  
64 the comprehensive understanding of the neural circuit dynamics that underlie diverse cognitive states

65 within the same individual. This lack of knowledge has translational implications. Multiple aspects of  
66 cognition are significantly altered in a range of neuropsychiatric disorders (Millan *et al.*, 2012), but the  
67 degree to which these abnormalities are specific to a particular cognitive/neural circuit; or occur across  
68 many cognitive operations and states remains unknown.

69 Here, we developed a scalable, mobile platform, *BrainE* (short for Brain Engagement), which aims at  
70 assessing cognitive control within and across humans, rapidly evaluating several integral cognitive  
71 processes simultaneously with electroencephalography (EEG) based neural recordings. In *BrainE*, we  
72 adopt standard cognitive assessments of attention, response inhibition, working memory, and distractor  
73 suppression in both non-emotional and emotional contexts, that are designed to be engaging and equally  
74 interpretable for individuals from diverse cultural backgrounds and across the lifespan. With the objective  
75 to make cognitive brain mapping scalable and accessible, we integrated non-invasive, mobile and semi-  
76 dry electrode EEG within *BrainE* for simultaneously acquiring cognitive behavioral data and neural  
77 signals. In this first *BrainE* study, we conduct cognitive brain mapping in healthy adult human subjects,  
78 investigating neural processes underlying stimulus encoding in multiple cognitive contexts. We also  
79 derive the cortical sources of the observed spectrotemporal neural dynamics. Additionally, in a second  
80 study, we present data from a two-visit experiment to assess the reliability of *BrainE* recordings, as well  
81 as the sensitivity of the cognitive neural markers to neuromodulation using transcranial magnetic  
82 stimulation (TMS).

83

## 84 Methods

### 85 **Experimental Design**

86 **Mental Health Ratings.** All participants completed subjective mental health self-reports using standard  
87 instruments: inattention and hyperactivity ratings were obtained on the ADHD Rating Scale (New York  
88 University and Massachusetts General Hospital. Adult ADHD-RS-IV\* with Adult Prompts. 2003; : 9–  
89 10), anxiety was measured using the Generalized Anxiety Disorder 7-item scale GAD-7 (Spitzer *et al.*,  
90 2006)), and depression was reported on the 9-item Patient Health Questionnaire (PHQ-9 (Kroenke,  
91 Spitzer and Williams, 2001)). We also obtained demographic variables by self-report including, age,  
92 gender, race and ethnicity, socio-economic status measured on the Family Affluence Scale (Boudreau  
93 and Poulin, 2008), and any current/past history of clinical diagnoses and medications.

94

95 ***BrainE* Neuro-Cognitive Assessments.** Assessments were developed and deployed by NEAT Labs  
96 (Misra *et al.*, 2018) on the Unity game engine. The Lab Streaming Layer (LSL, Kothe *et al.*, 2019)  
97 protocol was used to time-stamp each stimulus/response event in each cognitive task. Study participants  
98 engaged with *BrainE* assessments on a Windows-10 laptop sitting at a comfortable viewing distance.  
99 Participants underwent the following cognitive assessment modules that were completed within a 35 min  
100 session. **Figure 1** shows the stimulus sequence in each task.

101

102 **1. Selective Attention & Response Inhibition.** Participants accessed a game named *Go Green* modeled  
103 after the standard test of variables of attention (Greenberg and Waldman, 1993). In this simple two-block  
104 task, colored rockets were presented either in the upper/lower central visual field. Participants were  
105 instructed to respond to green colored rocket targets and ignore, i.e. withhold their response to distracting  
106 rockets of five other isoluminant colors (shades of cyan, blue, purple, pink, orange). The task sequence  
107 consisted of a central fixation ‘+’ cue for 500 msec followed by a target/non-target stimulus of 100 msec  
108 duration, and up to a 1 sec duration blank response window. When the participant made a response choice,  
109 or at the end of 1 sec in case of no response, a happy or sad face emoticon was presented for 200 msec  
110 to signal response accuracy, followed by a 500 msec inter-trial interval (ITI). To reinforce positive

111 feedback for fast and accurate responding, within 100-400 msec, two happy face emoticons were  
 112 simultaneously presented during the feedback period (Wodka *et al.*, 2007). Both task blocks had 90 trials  
 113 lasting 5 min each, with target/non-target trials shuffled in each block. A brief practice period of 4 trials  
 114 preceded the main task blocks. Summary total block accuracy was provided to participants at the end of  
 115 each block as a series of happy face emoticons (up to 10 emoticons) in this and in all assessments  
 116 described below.

117 In the first task block, green rocket targets were sparse (33% of trials), hence, selective attention was  
 118 engaged as in a typical continuous performance attention task. In the second block, green rocket targets  
 119 were frequent (67% of trials), hence, participants developed a prepotent impulse to respond. As  
 120 individuals must intermittently suppress a motor response to sparse non-targets (33% of trials), this block  
 121 provided a metric of response inhibition (Aron, 2007; Aron and Poldrack, 2005; Chambers *et al.*, 2009).

122

**A BrainE assessments with EEG recordings**

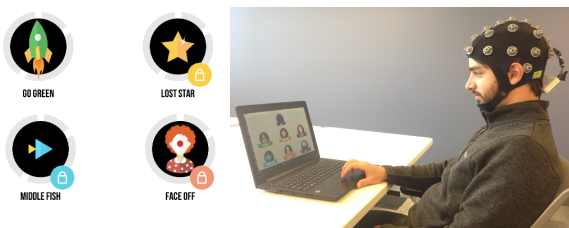

**B Selective Attention & Response Inhibition (Go Green)**

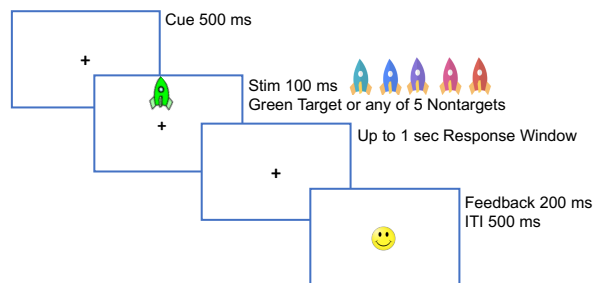

**C Working Memory (Lost Star)**

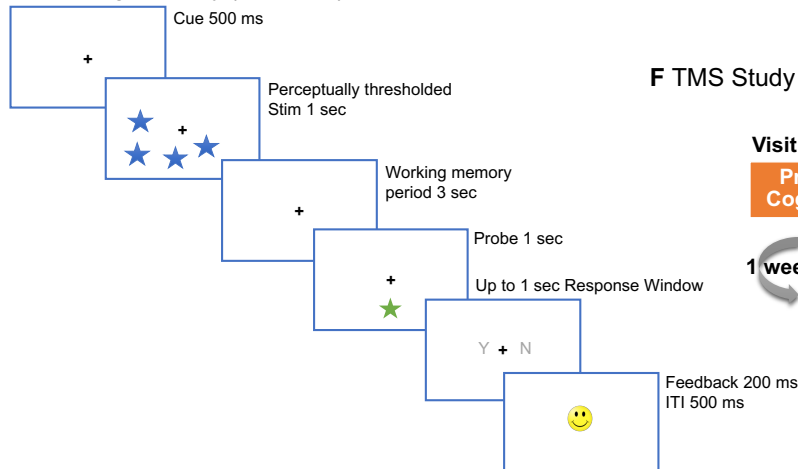

**D Interference Processing (Middle Fish)**

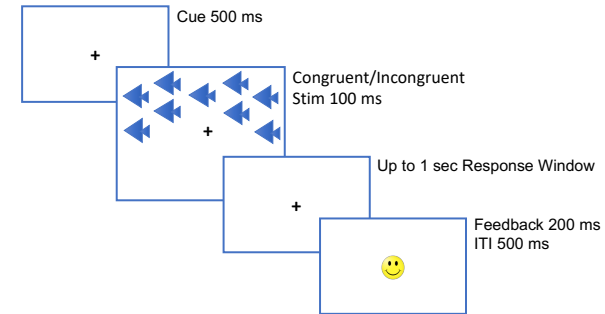

**E Emotion Interference Processing (Face Off)**

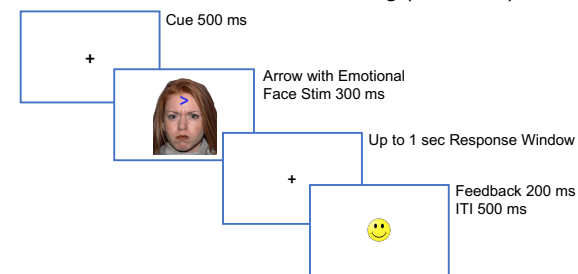

**F TMS Study Design**

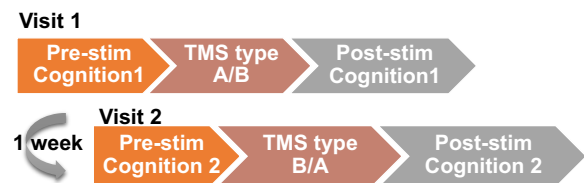

123

124

125 **Figure 1.** Cognitive studies delivered on the *BrainE* platform. (A) *BrainE* assessment dashboard with  
 126 the wireless EEG recording setup. (B) The selective attention and response inhibition task differ only in  
 127 the frequency of targets; sparse 33% targets appear in the Selective Attention block and frequent 67%  
 128 targets appear in the Response Inhibition block. (C) Working memory task with perceptually thresholded

129 stimuli. (D) Flanker interference processing task; flanking fish may either face the same direction as the  
130 middle fish on congruent trials, or the opposite direction on incongruent trials. (E) Emotion interference  
131 task presents neutral, happy, sad or angry faces superimposed on the arrow. (F) The TMS study involved  
132 two visits with two types of TMS stimulation A (cTBS) or B (iTBS) delivered in each week  
133 counterbalanced across subjects, and with immediate pre- and post- neurocognitive assessments.  
134

135 **2. Working Memory.** Participants accessed a game named *Lost Star* that is based on the standard visuo-  
136 spatial Sternberg task (Sternberg, 1966). Participants were presented a set of test objects (stars); they  
137 were instructed to maintain the visuo-spatial locations of the test objects in working memory for a 3 sec  
138 delay period, and then responded whether a probe object (star) was or was not located in the same place  
139 as one of objects in the original test set. We implemented this task at the threshold perceptual span for  
140 each individual, i.e. the number of star stimuli that the individual could correctly encode without any  
141 working memory delay. For this, a brief perceptual thresholding period preceded the main working  
142 memory task, allowing for equivalent perceptual load to be investigated across participants (Lavie et al.,  
143 2004). During thresholding, the set size of the test stars was progressively increased from 1-8 stars based  
144 on accurate performance; 4 trials were presented at each set size and 100% performance accuracy led to  
145 an increment in set size; <100% performance led to one 4-trial repeat of the same set size and any further  
146 inaccurate performance aborted the thresholding phase. The final set size at which 100% accuracy was  
147 obtained was designated as the individual's perceptual threshold.

148 Post-thresholding, the working memory task consisted of 48 trials presented over 2 blocks (Lenartowicz  
149 et al. 2014). Each trial initiated with a central fixation '+' for 500 msec followed by a 1 sec presentation  
150 of the test set of star objects located at various positions on the screen, then a 3 sec working memory  
151 delay period, followed by a single probe star object for 1 sec, and finally a response time window of up  
152 to 1 sec in which participants made a yes/no choice whether the probe star had a matching location to the  
153 previously presented test set. A happy/sad face emoticon was used to provide accuracy feedback for 200  
154 msec followed by a 500 msec ITI. Summary accuracy was also shown between blocks. The total task  
155 duration was 6 min.  
156

157 **3. Interference Processing.** Participants accessed a game named *Middle Fish*, an adaptation of the  
158 Flanker task (Eriksen and Eriksen, 1974), which has been extensively used to study interfering distractor  
159 processing (Lavie, Hirst and Fockert, 2004; Shipstead, Harrison and Engle, 2012). Participants were  
160 instructed to respond to the direction of a centrally located target (middle fish) while ignoring all flanking  
161 distractor fish. On congruent trials the flanker fish faced the same direction as the central fish, while on  
162 incongruent trials they faced the opposite direction. A brief practice of 4-trials preceded the main task of  
163 96 trials presented over two blocks for a total task time of 8 min. 50% of trials had congruent distractors  
164 and 50% were incongruent. To retain attention, the array of fish was randomly presented in the upper or  
165 lower visual field on equivalent number of trials. On each trial, a central fixation '+' appeared for 500  
166 msec followed by a 100 msec stimulus array of fish and up to a 1 sec response window in which  
167 participants responded left/right as per the direction of the middle fish. Subsequently a happy/sad face  
168 emoticon was presented for 200 msec for accuracy feedback followed by a 500 msec ITI. Summary  
169 accuracy was shown between blocks and the total task duration was 8 min.  
170

171 **4. Emotional Interference Processing.** We embedded this task in *BrainE* given ample evidence that  
172 emotions impact cognitive control processes (Gray, 2004; Pessoa, 2009; Inzlicht, Bartholow and Hirsh,  
173 2015). Participants accessed a game named *Face Off*, adapted from prior studies of attention bias in  
174 emotional contexts (López-Martín et al., 2013, 2015; Thai, Taber-Thomas and Pérez-Edgar, 2016). We  
175 used a standardized set of culturally diverse faces from the Nim-Stim database for this assessment  
176 (Tottenham et al., 2009). We used an equivalent number of males and female faces, each face with four

177 sets of emotions, either neutral, happy, sad or angry, presented on equivalent number of trials. An arrow  
178 was superimposed on the face on each trial, occurring either in the upper or lower central visual field on  
179 equal number of trials, and participants responded to the direction of the arrow (left/right). Participants  
180 completed 144 trials presented over three equipartitioned blocks with shuffled, but equivalent number of  
181 emotion trials in each block; a practice set of 4-trials preceded the main task. Each trial initiated with a  
182 central fixation '+' for 500 msec followed by a face stimulus with a superimposed arrow of 300 msec  
183 duration. As in other tasks, participants responded within an ensuing 1 sec response window, followed  
184 by a happy/sad emoticon feedback for accuracy (200 msec) and a 500 msec ITI. Summary block accuracy  
185 feedback was provided, and the total task duration was 10 min.

186  
187 **Electroencephalography (EEG).** EEG data was collected simultaneous to all cognitive tasks using a  
188 24-channel SMARTING device with a semi-dry and wireless electrode layout (Next EEG — new human  
189 interface, MBT). Data were acquired at 500 Hz sampling frequency at 24-bit resolution. Cognitive event  
190 markers were integrated using LSL and data files were stored in xdf format.

191  
192 **Repetitive Transcranial Magnetic Stimulation (rTMS).** In the second study, we used the FDA-  
193 approved Magventure stimulator (MagPro R30) for rTMS delivery. Each participant made two visits for  
194 this study, separated by a one-week interval, and each visit lasted up to 2 hours. Participants were  
195 provided either the continuous theta burst stimulation (cTBS) or intermittent TBS (iTBS) TMS protocol  
196 at each visit. Participants were blinded to the stimulation type, and stimulation order in week 1 or 2 was  
197 counterbalanced across subjects. The research staff who performed stimulation were blind to the effects  
198 of the cTBS or iTBS protocol, and the data analytics lead and study principal investigator were blind to  
199 the identity of the protocol i.e. all data were analyzed with cTBS blinded as stim A and iTBS as stim B.  
200 TBS stimulation was delivered to the midline at FCz target location, consistent with the pre-  
201 supplementary motor area site for rTMS in superior frontal cortex, which was active in most of our  
202 cognitive tasks (Verbruggen *et al.*, 2010). A train of 3 pulses, spaced 20 msec apart (50 Hz stimulation),  
203 followed by an inter-train interval of at least 200 msec (5 Hz) was applied either continuously (cTBS),  
204 or intermittently (iTBS) with a jitter between trains as has been tested in prior research (Rossi, Hallett,  
205 Rossini, Pascual-Leone, *et al.*, 2009; Oberman *et al.*, 2011). In cTBS, bursts of 3 pulses at 50 Hz were  
206 applied at a frequency of 5 Hz for 20 sec, total 100 bursts. In iTBS, ten 2 sec periods (10 bursts) of TBS  
207 were applied at a rate of 0.1 Hz for a total 100 bursts. Stimulation amplitude was set at 80% of motor  
208 threshold individually determined in each participant.

209 At each rTMS study visit, participants first performed *BrainE* assessments (pre-stim), then  
210 immediately received either cTBS or iTBS TMS stimulation, then performed *BrainE* again (post-stim).  
211 This within subject test-retest method allowed us to test for reliability of *BrainE* assessment data,  
212 comparing pre-stim week 1 versus pre-stim week 2 results. Additionally, we investigated the sensitivity  
213 of *BrainE* assessments to measure brain plasticity in pre-stim versus post-stim comparisons, as a function  
214 of different cognitive operations and rTMS protocols. Figure 1F shows the rTMS study design.

215  
216 **Data acquisition**  
217 **Participants.** 102 adult human subjects (mean age  $24.8 \pm 6.7$  years, range 18-50 years, 57 females)  
218 participated in the *BrainE* neuro-cognitive assessment study. Participants were recruited using IRB-  
219 approved on-campus flyers at UC San Diego as well as via the online recruitment forum,  
220 ResearchMatch.org, which hosts a registry of research volunteer participants; the ad on the Research  
221 Match registry was customized for participants in the general San Diego area (within 50 miles of our  
222 research location). Overall, ~50% of participants were university affiliates (lab members and students),  
223 while the rest were from the general population (i.e., Research Match registry). All participants provided  
224 written informed consent for the study protocol (#180140) approved by the University of California San

225 Diego institutional review board (UCSD IRB). Participant selection criteria included healthy adult status,  
226 i.e. without any current diagnosis for a neuropsychiatric disorder and/or current/recent history of  
227 psychotropic medications and/or hospitalization within the past 8 weeks. Five participants were excluded  
228 from the study as they had a current diagnosis for a psychiatric disorder and/or current/recent history of  
229 psychotropic medications. All participants reported normal/corrected-to-normal vision and hearing and  
230 no participant reported color blindness, majority of participants (95 of 102) were right handed. All  
231 participants had at least a high-school education (16 years). Unfortunately, we did not collect information  
232 on highest qualification.

233 For the two-visit TMS study, we enrolled 24 human subjects (mean age  $24.3 \pm 7.4$  years, 17 females).  
234 13 of these individuals had previously participated in the main *BrainE* assessment above, with a  
235 minimum one-month gap between participation in the two studies. Participants provided written  
236 informed consent for the TMS study protocol (#190059) approved by the UCSD IRB. The TMS study  
237 was pre-registered on Clinicaltrials.gov (NCT03946059). Participants were screened for this study prior  
238 to enrollment. Any individuals with a history of seizure disorder; vascular, traumatic, tumoral, infectious  
239 or metabolic lesion of the brain; administration of drugs that lower the seizure threshold; implanted or  
240 non-removable metallic objects above the neck; implanted devices with electrical circuits (pace-makers,  
241 cochlear implants) were excluded from enrollment. In addition, subjects were excluded if they had  
242 chronic sleep deprivation or confirmed heavy alcohol use (defined as greater than 5 episodes of binge  
243 drinking in the past month with  $>5$  alcohol drink-equivalents per sitting for men (or  $>4$  drink-equivalents  
244 per sitting for women). Subjects were also excluded if they reported the use of stimulant drugs in the past  
245 month (cocaine, methamphetamines), or if they were pregnant, or had any history of severe  
246 cardiovascular disease (i.e. history of transient ischemic attack, heart attack or stroke).

## 248 Behavioral and Neural Processing Methods

249 **Behavioral analyses.** Behavioral data for all cognitive tasks were analyzed for signal detection  
250 sensitivity,  $d'$ , computed as  $z(\text{Hits}) - z(\text{False Alarms})$  (Heeger and Landy, 2009). Task speeds were  
251 calculated as  $\log(1/\text{RT})$ , where RT is response time in milliseconds. Task efficiency was calculated as a  
252 product of  $d'$  and speed (Barlow *et al.*, 1980; Vandierendonck, 2017).  $d'$ , speed, and efficiency metrics  
253 were checked for normal distributions prior to statistical analyses.

254 **Neural Analyses.** We applied a uniform processing pipeline to all EEG data acquired simultaneous to  
255 the cognitive tasks. This included: 1) data pre-processing, 2) computing event related spectral  
256 perturbations (ERSP) for all channels, and 3) cortical source localization of the EEG data filtered within  
257 relevant theta, alpha and beta frequency bands.

259 1) Data preprocessing was conducted using the EEGLAB toolbox in MATLAB (Delorme and Makeig,  
260 2004). EEG data was resampled at 250 Hz, and filtered in the 1-45 Hz range to exclude ultraslow DC  
261 drifts at  $<1$ Hz and high-frequency noise produced by muscle movements and external electrical sources  
262 at  $>45$ Hz. We performed 827-point bandpass, zero phase, filtering with transition band width 4.063Hz,  
263 and passband edges of [1 45] Hz for cleaning the epoched data of time length [-1.5 1.5] secs; [3 7] Hz  
264 for theta specific filtering, [8 12] Hz for alpha specific and [13 30] Hz for beta specific data analysis.  
265 EEG data were average referenced and epoched to relevant stimuli in each task, as informed by the LSL  
266 time-stamps. While 24 channels is not a dense set, they are far enough from each other that no common  
267 neural signature is removed, but only common in-phase noise present in all channels is canceled during  
268 average referencing (Nunez, 2010). Any task data with missing LSL markers (1.4% of all data) had to be  
269 excluded from neural analyses. Any missing channel data (channel F8 in 2 participants) was spherically  
270 interpolated to nearest neighbors. Epoched data were cleaned using the autorej function in EEGLAB to  
271 remove noisy trials ( $>5$ sd outliers rejected over max 8 iterations;  $6.6 \pm 3.4\%$  of trials rejected per  
272 participant). EEG data were further cleaned by excluding signals estimated to be originating from non-

273 brain sources, such as electrooculographic, electromyographic or unknown sources, using the Sparse  
274 Bayesian learning (SBL) algorithm (Ojeda et al., 2018, 2019, <https://github.com/aojeda/PEB>) explained  
275 below.

276 2) For ERSP calculations, we performed time-frequency decomposition of the epoched data using the  
277 continuous wavelet transform (cwt) function in MATLAB's signal processing toolbox. Baseline time-  
278 frequency (TF) data in the -750 msec to -550 msec time window prior to stimulus presentation were  
279 subtracted from the epoched trials (at each frequency) to observe the event-related synchronization (ERS)  
280 and event-related desynchronization (ERD) modulations (Pfurtscheller, 1999).

281 3) Cortical source localization was performed to map the underlying neural source activations for the  
282 ERSPs using the block-Sparse Bayesian learning (SBL) algorithm (Ojeda, Kreutz-Delgado and Mullen,  
283 2018; Ojeda *et al.*, 2019) implemented in a recursive fashion. This is a two-step algorithm in which the  
284 first-step is equivalent to low-resolution electromagnetic tomography (LORETA, (Pascual-Marqui,  
285 Michel and Lehmann, 1994). LORETA estimates sources subject to smoothness constraints, i.e. nearby  
286 sources tend to be co-activated, which may produce source estimates with a high number of false  
287 positives that are not biologically plausible. To guard against this, SBL applies sparsity constraints in the  
288 second step wherein blocks of irrelevant sources are pruned. Source space activity signals were estimated  
289 and then their root mean squares were partitioned into 1) regions of interest (ROIs) based on the standard  
290 68 brain region Desikan-Killiany atlas (Desikan et al. 2006; **Supplementary Figure 1**) using the Colin-  
291 27 head model (Holmes *et al.*, 1998) and 2) artifact sources contributing to EEG noise from non-brain  
292 sources such as electrooculographic, electromyographic or unknown sources; activations from non-brain  
293 sources were removed to clean the EEG data. [The SBL GUI accessible through EEGLAB provides access  
294 to an EEG artifact dictionary; this dictionary is composed of artifact scalp projections and was generated  
295 based on 6774 ICs available from running Infomax ICA on two independent open-access studies  
296 \(<http://bnci-horizon-2020.eu/database/data-sets>, study id: 005-2015 and 013-2015\). The k-means method  
297 is used to cluster the IC scalp projections into Brain, EOG, EMG, and Unknown components. We checked  
298 visually that EOG and EMG components had the expected temporal and spectral signatures according to  
299 the literature \(Jung et al., 2000\). The SBL algorithm returns cleaned channel space EEG signals in  
300 addition to the derived cortical source signals as outputs. In this study, we first applied SBL to the epoched  
301 channel EEG signals; activations from artifact sources contributing to EEG noise, i.e., from non-brain  
302 sources such as electrooculographic, electromyographic or unknown sources, were removed to clean the  
303 EEG data \(Ojeda \*et al.\*, 2019\). Cleaned subject-wise trial-averaged channel EEG data were then  
304 specifically filtered in theta \(3-7 Hz\), alpha \(8-12 Hz\), and beta \(13-30 Hz\) bands and separately source  
305 localized in each of the three frequency bands and in each task to estimate their cortical ROI source  
306 signals. The source signal envelopes were computed in MatLab \(envelop function\) by a spline  
307 interpolation over the local maxima separated by at least one time sample; we used this spectral amplitude  
308 signal for all neural analyses presented here. We focused on post-stimulus encoding in the 100-300 msec  
309 range for theta and alpha bands, and 400-600 msec spectral amplitude range for the beta band signals,  
310 respectively. These epoch windows were chosen based on the peak global activity of the task-averaged  
311 signals in the respective frequency bands. We used these time windows to compute common-task-average  
312 neural signals and also distinct-task based neural activations across subjects.](#)

313  
314 **Statistical Analyses.** Behavioral data were compared across tasks using repeated measures analyses of  
315 variance (rm-ANOVA) with a within-subject factor of task-type; the Tukey-Kramer method was used  
316 for post-hoc testing.

317 Channel-wise theta, alpha, beta ERS and ERD modulations on each task, and within the common-  
318 task-average were analyzed for significance relative to baseline using t-tests ( $p \leq 0.05$ ), followed by false  
319 discovery rate (fdr) corrections applied across the three dimensions of time, frequency, and channels  
320 (Genovese, Lazar and Nichols, 2002).



321 Significant source activations underlying the theta, alpha, beta ERS and ERD modulations were  
322 computed using t-tests with Bonferroni family wise error rate (fwer) correction applied for multiple  
323 comparisons in the 68 ROI source dimension, 5 tasks and 3 frequency bands ( $p \leq 0.00005$ ). For the global  
324 cognitive task-averaged activity averaged across 5 tasks, the modulations were computed using t-tests  
325 fwer correction applied for multiple comparisons in the 68 ROI source dimension and 3 frequency bands  
326 ( $p \leq 0.00024$ ). Rm-ANOVA tests were conducted to investigate differences in frequency band x task type  
327 cortical activations, and the Tukey-Kramer method was used for post-hoc tests.

328 For the TMS study, we first calculated the Cronbach's alpha internal consistency measure (MatLab  
329 Intraclass Correlation Coefficient, ICC, type 'C-k' function) for the week 1 vs week 2 pre- data to assess  
330 reliability of the cognitive performance metrics as well as neural signals at each cortical source region.  
331 Additionally, we conducted rm-ANOVA tests with within-subjects factors of stimulation type (cTBS vs  
332 iTBS) and assessment time (pre- vs post-); results were corrected for multiple comparisons across 5  
333 cognitive tasks and 3 frequency bands at  $p \leq 0.003$  significance threshold, the significant ROIs were  
334 further corrected for multiple comparisons using *fdr*; the Tukey-Kramer method was used for post-hoc  
335 tests. Estimates of effect size were calculated as standardized mean difference/Cohen's *d* (Cohen *et al.*,  
336 1988) with the Hedges and Olkin small sample bias correction applied (Hedges and Olkin, 1985).

337 Finally, we investigated the relationship between the cognitive and neural activations versus  
338 subjective mental health symptom severity for anxiety, depression, inattention and hyperactivity self-  
339 reports using Spearman correlations (thresholded at  $p \leq 0.05$ ). For neural data, we used the significant  
340 global cognitive task-average activity for correlations. For the four symptom data that were highly  
341 correlated, we conducted a principal component analysis (PCA) and used the top PC that explained  
342 majority of the symptom score variance across subjects, and further corrected for multiple comparisons  
343 across ROIs and frequency bands using *fdr*. We confirmed Spearman correlations were appropriate for  
344 correlations based on the Anderson-Darling test for normality (Spearman, 1904; Anderson *et al.*, 1952)  
345 and confidence intervals were calculated using 10,000-iteration percentile bootstrap method (Efron,  
346 1982).

347

## 348 Results

349

350 **Behavioral performance.** Signal detection sensitivity *d'*, response times (msec), speed and efficiency  
351 for all tasks are shown in Table 1. Repeated measures ANOVAs were conducted on each behavioral  
352 variable with five task types as within-subjects factor. For *d'*, we found a significant effect of task ( $F_{4,384}$   
353  $= 218.22$ ,  $p < 0.0001$ ). Post-hoc tests revealed significant interactions between every task type pair  
354 ( $p < 0.05$ ). For speed and efficiency, we again found a significant effect of task (speed:  $F_{4,384} = 559.29$ ,  
355  $p < 0.0001$ ; efficiency:  $F_{4,384} = 715.13$ ,  $p < 0.0001$ ) and the post-hoc tests for each of them showed  
356 significant interaction between each task type pair ( $p < 0.001$ ) except for that between interference  
357 processing and emotion interference processing tasks for speed.

358

| Cognitive Task                  | <i>d'</i><br>mean $\pm$ std | Response time<br>median $\pm$ mad sec | Speed<br>mean $\pm$ std | Efficiency<br>mean $\pm$ std |
|---------------------------------|-----------------------------|---------------------------------------|-------------------------|------------------------------|
| Selective attention             | 4.47 $\pm$ 0.32             | 0.44 $\pm$ 0.03                       | 0.36 $\pm$ 0.05         | 0.34 $\pm$ 0.06              |
| Response inhibition             | 4.28 $\pm$ 0.46             | 0.40 $\pm$ 0.04                       | 0.40 $\pm$ 0.06         | 0.36 $\pm$ 0.07              |
| Working memory                  | 2.06 $\pm$ 0.92             | 0.88 $\pm$ 0.14                       | 0.04 $\pm$ 0.10         | 0.02 $\pm$ 0.05              |
| Interference processing         | 3.63 $\pm$ 0.83             | 0.48 $\pm$ 0.03                       | 0.31 $\pm$ 0.05         | 0.24 $\pm$ 0.06              |
| Emotion interference processing | 3.38 $\pm$ 0.65             | 0.48 $\pm$ 0.03                       | 0.31 $\pm$ 0.06         | 0.22 $\pm$ 0.05              |

359 Table 1. Behavioral performance across tasks for all participants ( $n=97$ ), as mean  $\pm$  standard error of  
360 mean (sem). Response times that did not have a normal distribution, are reported as median  $\pm$  median  
361 absolute deviation (mad).

362  
363  
364  
365  
366  
367  
368  
369  
370  
371  
372  
373  
374  
375  
376  
377  
378  
379  
380  
381  
382  
383  
384  
385  
386  
387  
388  
389  
390  
391  
392  
393  
394  
395  
396  
397

**Neural activations at EEG channels.** Results of the time-frequency decompositions of the stimulus-evoked neural activity are shown at exemplar electrodes, FCz and POz, for all five tasks and for the global cognitive average across tasks (**Figure 2**). ERS/ERD modulations in the data were fdr-corrected across time, frequency and channel dimensions across subjects. Most tasks had significant and equivalent ERS and ERD signatures at the channel level, with ERS predominant in the theta/alpha frequencies and ERD predominant in the beta frequency range. [We also show topographic maps in each task \(Figure 2\) for the stimulus-evoked peak activity windows and for frequency averaged theta, alpha, beta, during the 100-300 msec time range for theta and alpha, and 400-600 msec range for beta.](#)

**Neural activations at cortical sources.** Significant cortical source-localized neural activity in the theta, alpha and beta bands for the stimulus encoding period, for each cognitive task and for the global task-average are shown in **Figure 3**; both  $p < 0.05$  uncorrected and  $p \leq 0.00005$  [fwer-corrected maps for individual tasks](#),  $p \leq 0.00024$  [fwer-corrected global cognition maps](#) are shown. Consistent with the channel maps, theta and alpha frequencies predominantly showed ERS at bilateral cortical sites, while significant ERD was observed for beta frequencies prominently in medial [frontal, parietal, posterior cingulate cortex and left sensorimotor cortex.](#)

We conducted repeated measured ANOVAs on the source activations at the 68 ROIs with the three frequency bands and five task types as within-model factors, to investigate whether theta, alpha and beta band modulation patterns in cortical space were significantly different from each other across tasks. These analyses showed a main effect of frequency band ( $F_{2,134} = 13.65$ ,  $p < 0.0001$ ) and task ( $F_{4,268} = 12.79$ ,  $p < 0.0001$ ) and a significant frequency band x task interaction ( $F_{8,536} = 10.40$ ,  $p < 0.0001$ ). Post-hoc tests revealed significant differences in the three frequency band cortical activations in each task ( $p < 0.01$ ) except in the working memory task where there were no significant differences in theta/alpha/beta specific cortical maps.

Overall, the theta and alpha band cortical activations were significantly positively correlated, while these lower frequency activations were negatively correlated with the beta band activations (Pearson correlations on the global cognitive task-average data ( $p < 0.01$ ); **Supplementary Figure 2**). We also confirmed that the cortical activations maps were near equivalent if they were computed over all task trials vs. just correct trials ( $93.50 \pm 3.45\%$  correct trials averaged across tasks). These all vs. correct trial maps were strongly positively correlated in each frequency band (Spearman correlations on the global cognitive task-average maps across 68 ROIs,  $r(67) > 0.99$ ,  $p < 0.001$  for theta and alpha bands and  $r(67) = 0.78$ ,  $p < 0.001$  for beta band).

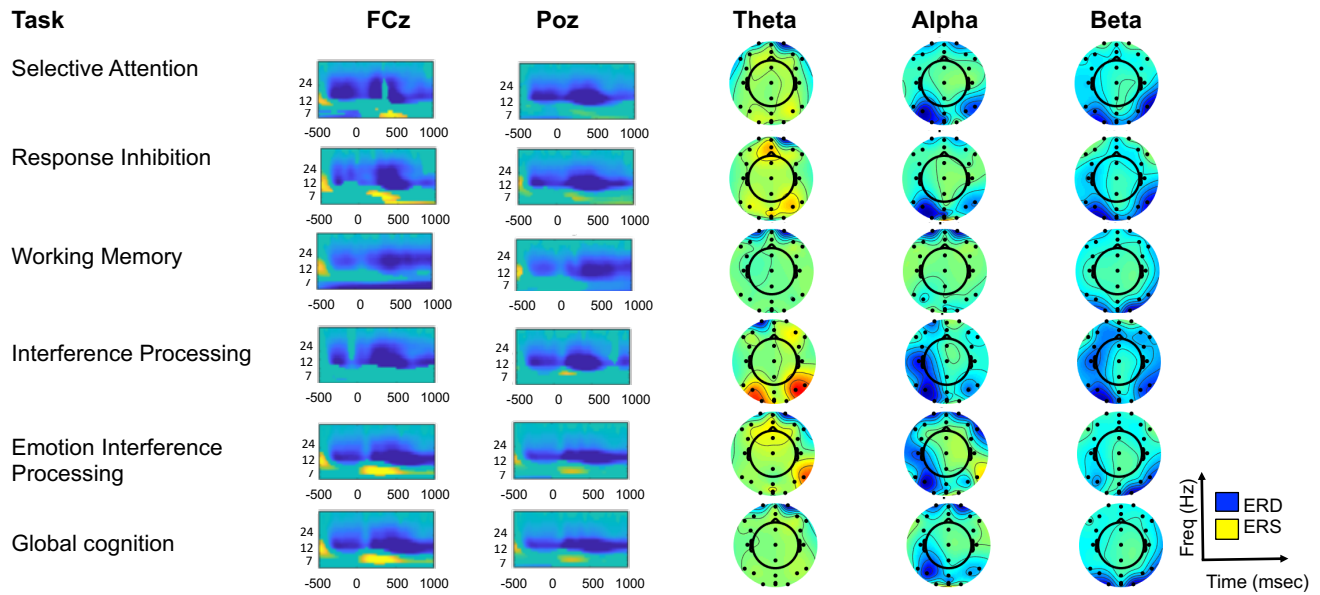

398

399

400

401

402

403

404

405

406

407

**Figure 2.** Significant event related synchronization (ERS: yellow) and desynchronization (ERD: navy blue), *fdr*-corrected, time-locked to the stimulus (-0.5 to +1 sec) across all tasks and averaged across tasks (global cognition) at exemplar electrodes FCz and POz. ERS was observed at theta/alpha frequencies while ERD was predominant in the beta frequency range. Topographic maps for the stimulus-evoked peak activity windows for the frequency-averaged theta, alpha and beta band signals are shown at right, for the peak time windows, of 100-300 msec for theta and alpha, and 400-600 msec for beta.

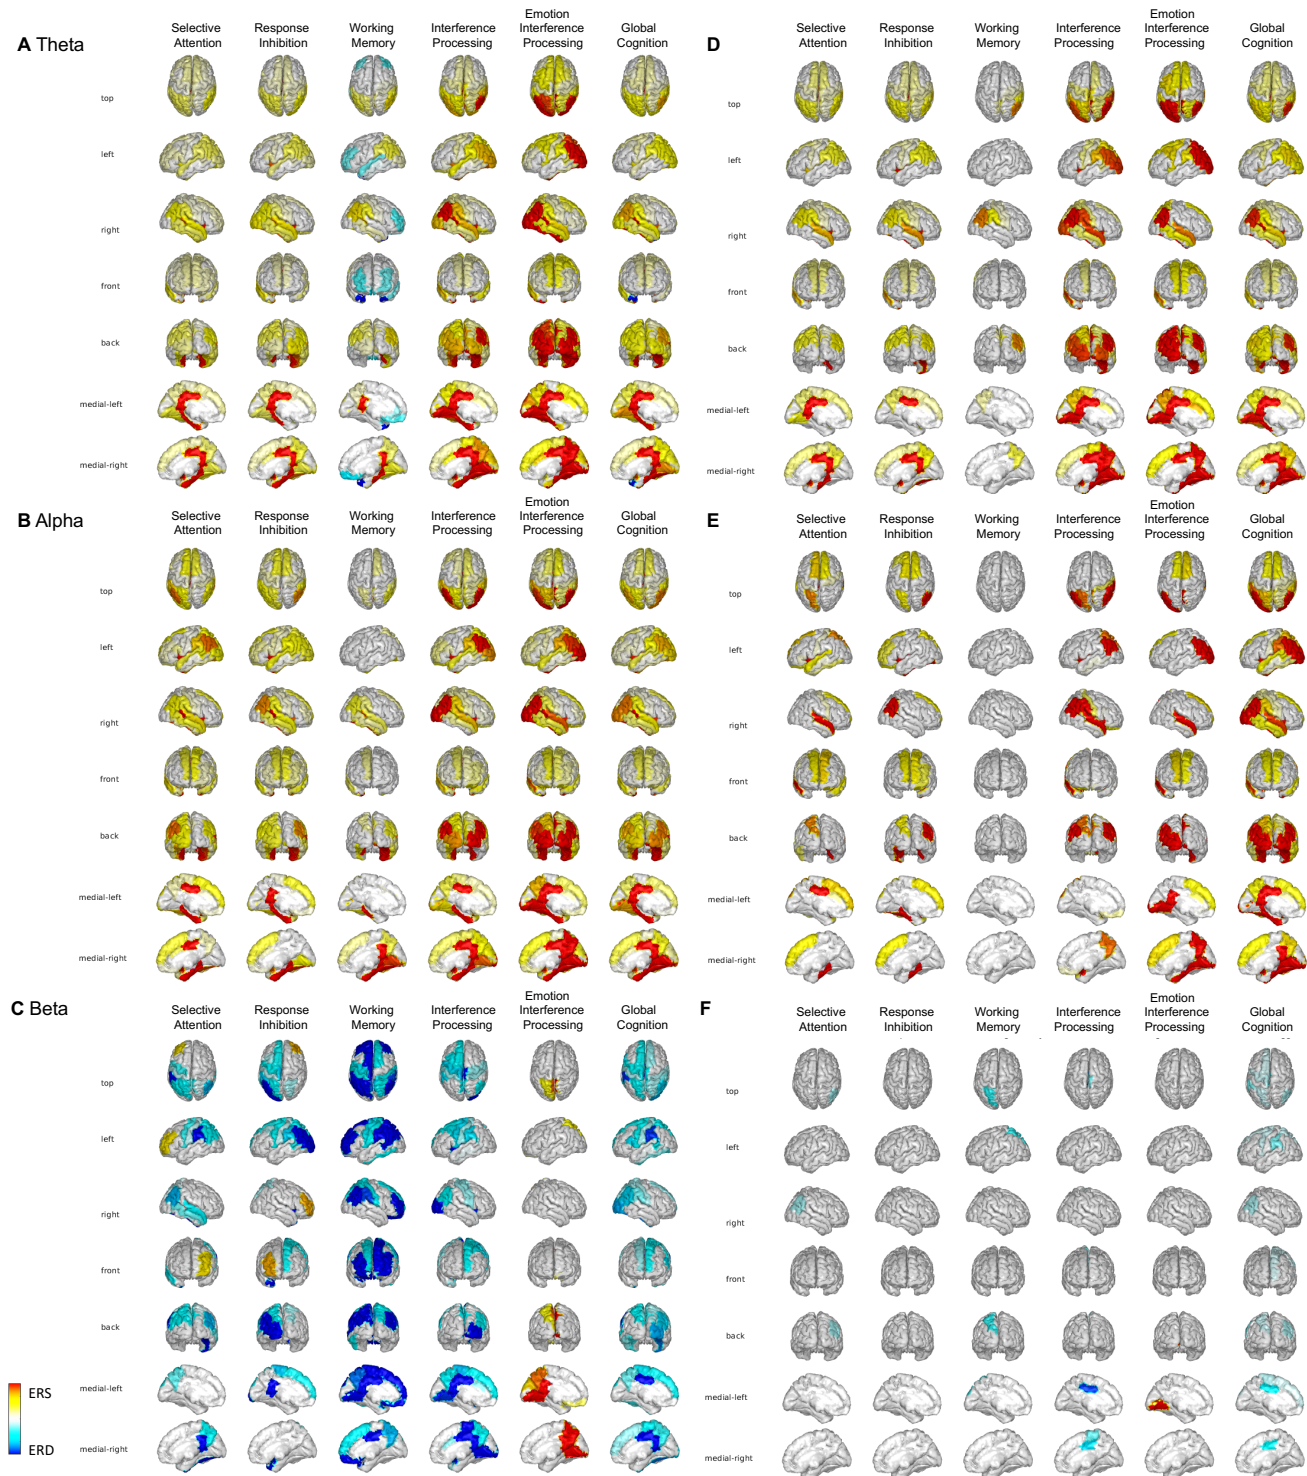

408

409

410

411

412

413

414

415

416

**Figure 3.** Significant theta, alpha and beta band ERS and ERD signatures during stimulus encoding relative to baseline for the five cognitive tasks and for the global cognitive task-average. Left column maps are at uncorrected  $p < 0.05$  threshold and right column maps are fwer corrected.

**Common and distinct neural activations across cognitive tasks.** We computed logical maps representing whether each cortical source was significantly active in one or more tasks regardless of the neural activity magnitude (binarized at  $p \leq 0.00005$  fwer threshold, Figure 4A); if any cortical source ROI

417 was uniquely active in a single cognitive task, we further identified that distinct task (Figure 4B). These  
418 maps showed neural activations in brain-wide ROIs in the theta/alpha bands in the majority of tasks, with  
419 greater cortical overlap in the theta than alpha band (up to 3 tasks). In the beta band there was **no**  
420 overlapping task activity.

421 Distinct task activation maps revealed that only the selective attention task significantly activated  
422 left inferior frontal cortex, bilateral sensory-motor cortices, left superior temporal cortices in the alpha  
423 band. The response inhibition task selectively activated the left caudal middle frontal area, commonly  
424 referred to as dorsolateral prefrontal cortex (DLPFC), in the alpha band. Activity related to stimulus-  
425 encoding on the working memory task was observed in left superior parietal cortex in the beta band. The  
426 Flanker interference task selectively activated right inferior frontal cortex, bilateral orbitofrontal, right  
427 sensory and supramarginal cortices in the alpha band, bilateral posterior cingulate in the beta band.  
428 Finally, the emotion interference task selectively activated left caudal middle frontal area/dlPFC in the  
429 theta band as well as left orbitofrontal, right anterior cingulate, left posterior/isthmus-cingulate cortex  
430 and bilateral fusiform regions in the alpha band, and left fusiform activation in the beta band, potentially  
431 specific to face stimuli in this task.  
432

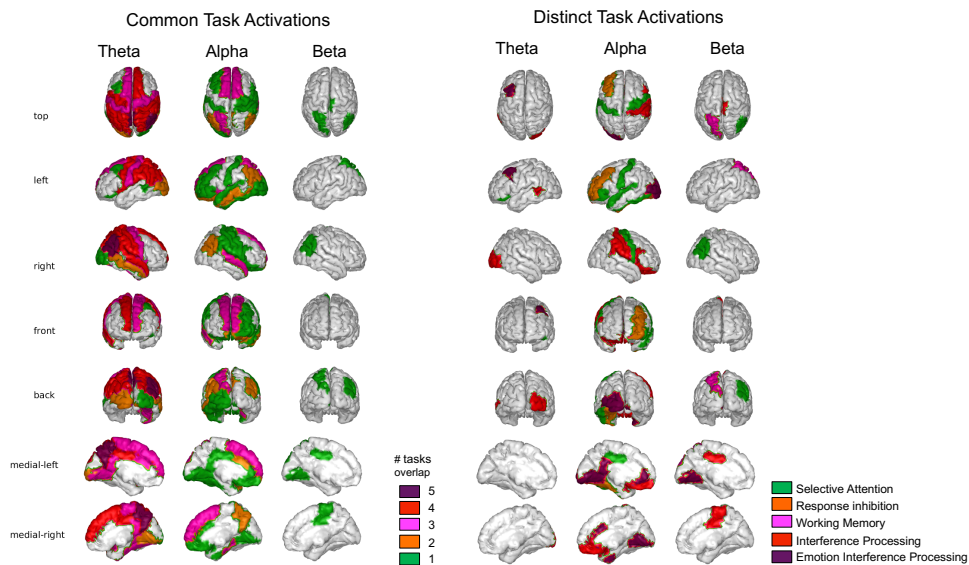

433  
434

435 **Figure 4.** Common and distinct neural activations across tasks. (A) Common activation brain maps are  
436 logical maps showing cortical sources that are active during stimulus encoding in one or more cognitive  
437 tasks. (B) Distinct activation brain maps are logical maps showing cortical sources that are active during  
438 stimulus encoding only in one particular cognitive task. Logical maps are based on significantly active  
439 ROIs within task at  $p \leq 0.00005$  fwer threshold.  
440

441 **TMS driven cognitive neuroplasticity.** In this second study, participants made two visits completing  
442 the five *BrainE* cognitive tasks twice at each visit, pre- and post- rTMS application. Either the cTBS or  
443 iTBS protocol for rTMS was applied at each visit counterbalanced across subjects (see Methods, Figure  
444 1F). We calculated Cronbach's alpha as a summary reliability measure for the pre-stim visit 1 vs. visit 2  
445 cognitive and neural data. For cognitive performance across the 25 healthy subjects, reliability was high  
446 (task-averaged Cronbach's alpha for  $d'$ : 0.83, speed: 0.80, efficiency: 0.80,  $p < 0.0001$ ). For neural activity  
447 averaged across all five tasks and concatenated across all three frequency bands and summarized across  
448 cortical source sites, reliability was high (Cronbach's alpha = 0.77,  $p < 0.0001$ ). When neural data were  
449 further analyzed separately for reliability in the three frequency bands, Cronbach's alpha values were  
450 more variable (for theta: 0.55,  $p < 0.05$ ; alpha: 0.73,  $p = 0.001$ ; beta: 0.44,  $p = 0.08$ ), though paired t-tests

451 confirmed that visit 1 vs. 2 pre-stim neural data were not significantly different in any frequency band  
452 (all  $p > 0.05$ ). Finally, we also calculated neural reliability concatenated across all three frequency bands  
453 within each cortical source region, showing moderate to high test-retest reliability across different  
454 cortical ROIs (Figure 5A).

455 We performed a 3-factor repeated measures ANOVA for each behavioral measure ( $d'$ , speed,  
456 efficiency) with task type, assessment time (pre-stim, post-stim) and stimulation type (cTBS, iTBS) as  
457 within-subject factors. No analyses showed main effects or interactions for stimulation type, thus single  
458 session rTMS stimulation did not affect cognitive behaviors. A significant main effect of task type was  
459 found for each behavioral measure ( $d'$ :  $F_{4,92}=188.47.65$ ,  $p < 0.0001$ ; speed:  $F_{4,92}=159.17$ ,  $p < 0.0001$ ;  
460 efficiency:  $F_{4,92}=342.34$   $p < 0.0001$ ), and similarly assessment time also showed a significant main effect  
461 for each measure ( $d'$ :  $F_{1,23}=6.53$ ,  $p=0.02$ ; speed:  $F_{1,23}=81.27$ ,  $p < 0.0001$ ; efficiency:  $F_{1,23}=38.42$ ,  
462  $p < 0.0001$ ); a significant task x assessment time interaction only emerged for the speed measure  
463 ( $F_{4,92}=9.86$ ,  $p < 0.0001$ ) that showed significantly greater speed at post vs. pre for all tasks ( $p < 0.01$ ). Post-  
464 hoc pre/post speed comparisons (Tukey-Kramer test) showed a larger post vs. pre change for working  
465 memory ( $\Delta$ speed,  $0.04 \pm 0.006$ ,  $p < 0.0001$ ) followed by that for sustained attention ( $\Delta$ speed,  $0.02 \pm 0.004$ ,  
466  $p=0.0009$ ) and emotion interference processing ( $\Delta$ speed,  $0.02 \pm 0.003$ ,  $p < 0.0001$ ) and then for flanker  
467 interference ( $\Delta$ speed,  $0.01 \pm 0.003$ ,  $p=0.008$ ) and response inhibition ( $\Delta$ speed,  $0.01 \pm 0.004$ ,  $p=0.003$ ), but  
468 with no differential effect by stimulation type.

469 In rm-ANOVAs conducted on the neural data, we explicitly focused on significant stimulation type  
470 x assessment time interactions to understand differential neuroplasticity outcomes of cTBS vs iTBS.  
471 Results were thresholded at  $p \leq 0.003$  fwer for 5 tasks x 3 frequency band comparisons and fdr-corrected  
472 for multiple comparisons across all ROIs (Figure 5B). These interactions exclusively showed  
473 significance for the emotional interference task in the left superior parietal brain region with a large effect  
474 size in the theta band (Cohen's  $d$ , iTBS>cTBS, 1.32, 95% CI [0.7 1.94],  $p=0.0011$ ), in left lateral occipital  
475 area with a medium effect size in the alpha band (Cohen's  $d$ , iTBS>cTBS, 0.65, 95% CI [0.07 1.23],  
476  $p=0.0006$ ), and in right superior frontal/rostral anterior cingulate cortex with a large effect size in the  
477 beta band (Cohen's  $d$ , iTBS>cTBS, 1.09, 95% CI [0.49 1.70],  $p=0.0029$ ).  
478

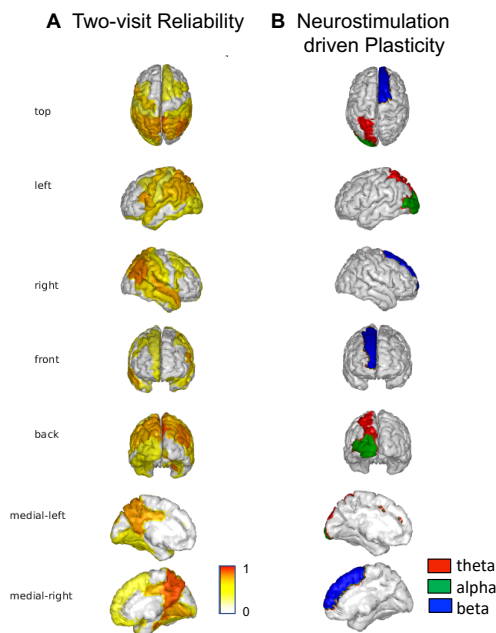

479  
480  
481 **Figure 5.** TMS study results. (A) Neural data acquired at pre-TMS at visit 1 and 2 showed moderate to  
482 high reliability measured across all three frequency bands using Cronbach's alpha calculated for each

483 cortical source region [min: 0.5 max: 0.9, thresholded at  $p < 0.05$ ]. (B) Significant stimulation type (iTBS  
484 vs. cTBS) by time (pre- vs. post-stim) neural interactions in rm-ANOVAs emerged only for the emotion  
485 interference processing task, shown in red for theta band, green for alpha band and blue for beta band  
486 activations (post-pre iTBS > cTBS,  $p \leq 0.003$  fwer correction applied for 5 tasks x 3 frequency comparisons  
487 and fdr-corrected for brain-wide ROI multiple comparisons).

488  
489 **Cognitive neural correlates of subjective mental health.** All participants provided self-reports on  
490 standard scales of anxiety, depression, inattention and hyperactivity. These four symptoms had high inter-  
491 correlation coefficients (mean  $\pm$  sem,  $r = 0.57 \pm 0.03$ ,  $p < 0.0001$ ) in our participant sample. Hence, we  
492 conducted a PCA of the symptoms and extracted the top mental health PC that explained 69.72% variance  
493 in the symptom data; other PC components were not considered as they each explained less than a quarter  
494 of the total variance. Spearman correlations of the cognitive metrics (d'/speed/efficiency) with the mental  
495 health PC did not show any significant correlations (all  $p > 0.05$ ).

496 For mental health correlations with neural data, we focused on the significant global task-averaged  
497 evoked activity (Figure 3, rightmost column) and found several symptom correlates, specifically in the  
498 theta and alpha bands (Table 2 and Figure 6,  $p < 0.05$  corrected for multiple comparisons across ROIs  
499 and frequency bands using fdr, associated scatter plots shown in Supplementary Figure 3). In all cases,  
500 more severe symptoms across our healthy participant sample were associated with significantly reduced  
501 ERS activity. Theta/alpha symptom correlates were widespread and included distinct cognitive control  
502 regions of the fronto-parietal network including the left DLPFC (Caudal middle frontal L in Table 2),  
503 temporal regions, and visual areas such as the precuneus showed negative correlations with the symptom  
504 PC.  
505

| Freq  | ROI                     | rho   | upper CI | lower CI | p     |
|-------|-------------------------|-------|----------|----------|-------|
| Theta | Caudal middle frontal L | -0.25 | -0.43    | -0.05    | 0.015 |
|       | Insula R                | -0.24 | -0.42    | -0.05    | 0.020 |
|       | Para-hippocampal L      | -0.28 | -0.46    | -0.09    | 0.005 |
|       | Para-hippocampal R      | -0.29 | -0.47    | -0.09    | 0.004 |
|       | Precentral L            | -0.24 | -0.42    | -0.04    | 0.021 |
|       | Precuneus L             | -0.25 | -0.43    | -0.06    | 0.015 |
|       | Precuneus R             | -0.23 | -0.42    | -0.02    | 0.026 |
|       | Transverse temporal R   | -0.21 | -0.40    | -0.02    | 0.038 |
| Alpha | Middle temporal R       | -0.27 | -0.46    | -0.07    | 0.008 |

506  
507 **Table 2.** Global task-averaged neural correlates of subjective mental health symptoms. Significant  
508 correlates were observed in theta and alpha frequency bands (Spearman correlations,  $p < 0.05$  fdr-  
509 corrected for multiple comparison across ROIs and frequency bands). Correlation coefficients, upper and  
510 lower 95% confidence intervals (CI) and p-values are shown.  
511

Neural Correlates of Mental Health Symptoms

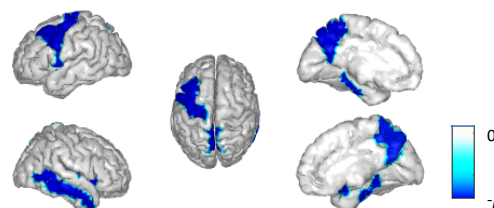

512  
513 **Figure 6.** Global task-average neural correlates of subjective mental health. We found significant neural  
514 correlations with the top principal mental health symptom component that explained 69.72% variance  
515 across all symptoms. All correlations were negative and predominantly in the theta band (Table 2).

516 Correlations used the Spearman method ( $p < 0.05$ ,  $\rho$  ( $\rho$ ) values were *fdr*-corrected for multiple  
517 comparisons across ROIs and frequency bands).

## 518 Discussion

519  
520 In this study, we developed a scalable and accessible, mobile EEG based platform to assess neuro-  
521 cognitive processing. We refer to this platform as *BrainE* (short for Brain Engagement) and demonstrate  
522 how it can be used to inform cognitive and neural processes, specifically stimulus encoding, in five  
523 cognitive task contexts - selective attention, response inhibition, interference processing, emotional  
524 interference processing, and working memory. We present cortical processes parsed in distinct theta,  
525 alpha and beta frequency bands, with robust ERS in theta and alpha and inversely correlated ERD in the  
526 beta band. We demonstrate that the five tasks elicit common stimulus encoding related neural processing  
527 as well as some distinct cortical activations. In a second experiment that used rTMS to engender  
528 neuroplasticity, we show that specific cognitive tasks exhibit differential neural outcomes to two  
529 different, continuous versus intermittent, theta burst stimulation protocols.

530  
531 Notably, we conducted these experiments with mobile wireless EEG in a rapid test sequence of less  
532 than an hour per subject. The results processed in the cortical space demonstrate consistency with  
533 findings from neuroimaging studies using less scalable approaches such as fMRI or high density EEG.  
534 Electrophysiological studies in primates and humans have shown that theta and alpha band evoked  
535 responses are broadly distributed in the brain and reflect many top-down cognitive control operations  
536 including goal directed attention, memory encoding, and novelty detection among others, consistent with  
537 our results (Aftanas and Golocheikine, 2001; Makeig *et al.*, 2002; Ekstrom *et al.*, 2005; Christie and Tata,  
538 2009; Mishra *et al.*, 2012; Buzsáki and Moser, 2013). In beta band [global cognitive activity](#), we observed  
539 left lateralized sensory-motor ERD, contralateral to the right-hand dominant responses made by our  
540 participants, which is consistent with motor performance representations in prior studies (Aron, 2007;  
541 Picazio *et al.*, 2014; Zavala, Jang, Trotta, Codrin I Lungu, *et al.*, 2018; Khanna and Carmena, 2017).  
542 [Amongst some interesting activations, the response inhibition task specifically showed alpha ERS in left  
543 caudal middle frontal cortex \(DLPFC area\) and the selective attention task showed significant ERS in  
544 left inferior frontal cortex, which aligns with previous findings](#) (Aftanas and Golocheikine, 2001; Palva  
545 and Palva, 2007; Zavala, Jang, Trotta, Codrin I Lungu, *et al.*, 2018; Beltrán *et al.*, 2019; [Chong, Williams,  
546 Cunnington, and Mattingley, 2008](#)). In our implementation, these two tasks only differed in the presented  
547 frequency of target vs. non-target stimuli and both tasks required moment-to-moment flexible decision-  
548 making whether to respond or to inhibit response; many studies show that DLPFC is important for such  
549 flexible decision-making (Dosenbach *et al.*, 2007; Menon and Uddin, 2010) with noted alpha band  
550 oscillatory effects found in this region (Sadaghiani *et al.*, 2012, 2019). The Flanker interference  
551 processing task significantly activated right inferior frontal cortex as well as right sensory-motor areas  
552 in the alpha band, which is in line with studies of interference control and inhibitory processing (Brass  
553 *et al.*, 2005; Tettamanti *et al.*, 2008; Hampshire *et al.*, 2010; Zanto *et al.*, 2011; Mishra *et al.*, 2014;  
554 Zavala, Jang, Trotta, Codrin I Lungu, *et al.*, 2018; Beltrán *et al.*, 2019). The emotional interference  
555 processing task particularly activated left caudal middle frontal area or DLPFC in the theta band aligned  
556 with other neuroimaging studies using emotion tasks ([Siegle \*et al.\*, 2007](#); [Grimm \*et al.\*, 2008](#); [Avisar  
557 \*et al.\*, 2017](#)); posterior (isthmus-) cingulate cortex in the alpha band was also modulated in this task as  
558 observed by others (Waugh, Lemus and Gotlib, 2014; Okon-Singer *et al.*, 2015; Song *et al.*, 2017).  
559 Finally, during working memory encoding, we observed distinct activity in the beta band that localized  
560 to parietal cortex matching prior evidence, especially with respect to right hemispheric activations  
561 (Berryhill and Olson, 2008; Nee *et al.*, 2013). These results provide confidence that a mobile EEG tool,



562 which can be easily scaled to any lab/community setting with limited resources, can be used to generate  
563 neuro-cognitive results that replicate the literature.

564

565 In the rTMS study, we first demonstrated that the task-related cognitive performance and neural  
566 processing data were reliably replicable across two baseline sessions completed one-week apart.  
567 Specifically, we computed intraclass correlation coefficients between the two baseline sessions that  
568 showed moderate-to-high reliability, particularly in the visual, parietal and temporal regions relative to  
569 the frontal activations, consistent with findings in other studies (McEvoy, 2000; Gudmundsson *et al.*,  
570 2007). We compared cognitive and neural effects of continuous (cTBS) and intermittent (iTBS) theta  
571 burst stimulation protocols, as previous studies have suggested their contrasting effects—iTBS to  
572 facilitate while cTBS to inhibit cortical excitability (Thimm and Funke, 2015; Viejo-Sobera *et al.*, 2017;  
573 Vékony *et al.*, 2018). No such differential effects were found for the cognitive performance measures;  
574 both stimulation protocols speeded up information processing as evidenced in post- vs. pre-stimulation  
575 response time differences in several tasks, most prominently on the working memory task. This was an  
576 interesting finding given that our healthy participant sample was already performing at high accuracy on  
577 the cognitive tasks, and suggests that rTMS application generally enhanced alertness (Guse, Falkai and  
578 Wobrock, 2010; Mensen *et al.*, 2014). Absence of a sham rTMS arm limits further interpretation. Notably,  
579 medium to large effect size differential neural outcomes were observed for iTBS versus cTBS,  
580 particularly in the emotion interference processing task in all theta/alpha/beta frequency bands. The  
581 majority of these effects showed greater positive neuroplasticity for iTBS versus cTBS (W, 2005; Hoy *et al.*,  
582 2016). Modulations were observed in occipito-parietal brain regions in theta/alpha and in cognitive  
583 control regions of superior frontal/rostral anterior cingulate cortex in the beta band. The specificity of  
584 these results to certain tasks, brain regions and neural rhythms shows that the *BrainE* platform has utility  
585 for assessing rTMS related neuro-cognitive plasticity in future studies. Interestingly, rTMS is an FDA-  
586 approved treatment for depression (Rossi, Hallett, Rossini and Pascual-Leone, 2009; George, Taylor and  
587 Short, 2013), a disorder with emotion dysregulation problems. That we find neural processes on an  
588 emotion interference processing task sensitive to rTMS protocols suggests that this task could serve as a  
589 promising assay for measuring neuro-cognitive outcomes in future rTMS studies of depression.

590

591 While we investigated neuro-cognitive outcomes in healthy subjects excluding data from those with  
592 a clinical diagnosis, the study participants reported varying degrees of severity of anxiety, depression,  
593 inattention and hyperactivity symptoms. Self-reports were highly correlated across the four symptom  
594 scales, hence, we extracted the top principal component of the mental health symptoms. We found  
595 widespread mental health correlations of global task-averaged neural activity in the theta band, and a few  
596 activations in the alpha band. All correlations were negative showing reduced theta/alpha activity with  
597 greater symptom severity. The DLPFC/caudal middle frontal region, insular cortex were prominent in  
598 these neuro-behavioral correlations, aligned with studies demonstrating dysfunction in the core cognitive  
599 control networks, the fronto-parietal network and the cingulo-opercular network, in mood disorders  
600 (McNaughton, 1997; Deckersbach, Dougherty and Rauch, 2006; Zhao *et al.*, 2007; Canbeyli, 2010;  
601 Brzezicka, 2013; Etkin, Gyurak and O'Hara, 2013) and in ADHD (Hesslinger *et al.*, 2002; Biederman *et al.*,  
602 2008; Bush, 2011). Finally, we also found negative symptom correlations in the memory-related  
603 middle temporal area, and orbital network including para-hippocampal regions (Haldane and Frangou,  
604 2006; Price and Drevets, 2012).

605

606 Overall, our research shows that the *BrainE* platform can serve as a useful tool to map several  
607 dimensions of neuro-cognition in a rapid, scalable and cost-effective manner. We further demonstrate  
608 that the tool can be used to study neuroplasticity of targeted interventions. In this study, the emotion  
609 interference processing task was most sensitive to differential neurostimulation protocols. We also show

610 meaningful correlates of mental health symptoms. In future, this research platform can serve to inform  
611 the Research Domain Criteria (RDoc) framework for investigating mechanisms of mental disorders  
612 (Insel *et al.*, 2010), both in terms of understanding the neuro-cognitive correlates of mental disorders and  
613 to study specific circuit engagement in the context of targeted interventions that engage neuroplasticity.  
614 Notably, we quantify several analyses in cortical source space, thus, facilitating comparison with the  
615 EEG as well as fMRI literature. While this particular study was limited to a healthy adult cohort, we aim  
616 to integrate this platform in future neuro-cognitive studies in children and adolescents, aging adults, as  
617 well as individuals with clinical psychiatric diagnoses. Given the mobility of the *BrainE* platform, it is  
618 not limited to the research lab setting, and can be used to reach participants and acquire data in  
619 community settings such as schools and clinics, enabling greater diversity in research participation  
620 (Mishra, 2019). Finally, we have only scratched the surface of the rich neural dynamics that can be  
621 investigated in this dataset, limiting the neural analyses in this study to stimulus-evoked spectrotemporal  
622 activity modulations on core cognitive tasks; future studies may investigate aspects of functional  
623 connectivity as well as information processing in the context of task cues, and onset of responses and  
624 rewards on these tasks and newly added cognitive tasks. Fundamentally, the *BrainE* platform enables  
625 systematic cognitive neuroscience studies at scale across the mental health spectrum. In future, it may be  
626 used to find new biomarkers of brain-targeted interventions, and its ease of use may help to reduce the  
627 replicability crisis of small sample lab studies.

628

## 629 [CRedit author statement](#)

630 [Pragathi Priyadharsini Balasubramani: Conceptualization, Methodology, Formal Analysis and](#)  
631 [Investigation, Writing- Reviewing and Editing](#)

632 [Alejandro Ojeda: Methodology, Writing](#)

633 [Gillian Grennan , Vojislav Maric, Hortense Le, Fahad Alim, Mariam Zafar-Khan, Juan Diaz-Delgado,](#)

634 [Sarita Silveira: Investigation and Data Curation](#)

635 [Dhakshin Ramanathan: Conceptualization, Methodology](#)

636 [Jyoti Mishra: Conceptualization, Methodology, Reviewing and Editing, Supervision](#)

## 637 Acknowledgements

638 This work was supported by University of California San Diego (UCSD) lab start-up funds (DR,  
639 JM), the Interdisciplinary Research Fellowship in NeuroAIDS (PB: R25MH081482), the Burroughs  
640 Wellcome Fund Career Award for Medical Scientists (DR) and the VA Medical Center Career  
641 Development Award (DR: 7IK2BX003308). We thank Alankar Misra for software development of the  
642 *BrainE* software and several UCSD undergraduate students who assisted with data collection. The  
643 *BrainE* software is copyrighted for commercial use (Regents of the University of California Copyright  
644 #SD2018-816) and free for research and educational purposes.

## 645 [Data Availability](#)

646 [The dataset in this study is available on the open-access repository link: 10.5281/zenodo.4088951](#)

## 647 Conflict of Interest.

648 The authors declare no conflict of interest.

## 649 References

650

- 651 Aftanas, L. I. and Golocheikine, S. A. (2001) 'Human anterior and frontal midline theta and lower  
652 alpha reflect emotionally positive state and internalized attention: high-resolution EEG investigation of  
653 meditation', *Neuroscience Letters*, 310(1), pp. 57–60. doi: 10.1016/S0304-3940(01)02094-8.
- 654 Anderson, T. W., Darling, D. A., Anderson, T. W. and Darling, D. A. (1952) 'Asymptotic theory of  
655 certain goodness-of-fit criteria based on stochastic processes.' Available at:  
656 <https://www.scienceopen.com/document?vid=dd93f22b-2a06-4923-96bb-540c099e7db7> (Accessed: 10  
657 April 2020).
- 658 Aron, A. R. (2007) 'The neural basis of inhibition in cognitive control', *Neuroscientist*, 13, pp. 214–  
659 228. doi: 10.1177/1073858407299288.
- 660 Aron, A. R. and Poldrack, R. A. (2005) 'The Cognitive Neuroscience of Response Inhibition :  
661 Relevance for Genetic Research in Attention-Deficit /', *Biological psychiatry*, 57, pp. 1285–1292. doi:  
662 10.1016/j.biopsych.2004.10.026.
- 663 Avissar, M., Powell, F., Ilieva, I., Respino, M., Gunning, F. M., Liston, C. and Dubin, M. J. (2017)  
664 'Functional Connectivity of the Left DLPFC to Striatum Predicts Treatment Response of Depression to  
665 TMS', *Brain stimulation*, 10(5), pp. 919–925. doi: 10.1016/j.brs.2017.07.002.
- 666 Badre, D. (2011) 'Defining an Ontology of Cognitive Control Requires Attention to Component  
667 Interactions', *Topics in cognitive science*, 3, pp. 217–221. doi: 10.1111/j.1756-8765.2011.01141.x.
- 668 Barlow, H. B., Lal, S., Longuet-Higgins, H. C. and Sutherland, N. S. (1980) 'The absolute efficiency of  
669 perceptual decisions', *Philosophical Transactions of the Royal Society of London. B, Biological  
670 Sciences*. Royal Society, 290(1038), pp. 71–82. doi: 10.1098/rstb.1980.0083.
- 671 Bayerl, M., Dielentheis, T. F., Vucurevic, G., Gesierich, T., Vogel, F., Fehr, C., Stoeter, P., Huss, M. and  
672 Konrad, A. (2010) 'Disturbed brain activation during a working memory task in drug-naive adult  
673 patients with ADHD', *NeuroReport*, 21(6), pp. 442–446. doi: 10.1097/WNR.0b013e328338b9be.
- 674 Beltrán, D., Morera, Y., García-Marco, E. and Vega, M. de (2019) 'Brain Inhibitory Mechanisms Are  
675 Involved in the Processing of Sentential Negation, Regardless of Its Content. Evidence From EEG  
676 Theta and Beta Rhythms', *Frontiers in Psychology*, 10. doi: 10.3389/fpsyg.2019.01782.
- 677 Berryhill, M. E. and Olson, I. R. (2008) 'The right parietal lobe is critical for visual working memory',  
678 *Neuropsychologia*, 46(7), pp. 1767–1774. doi: 10.1016/j.neuropsychologia.2008.01.009.
- 679 Biederman, J., Makris, N., Valera, E. M., Monuteaux, M. C., Goldstein, J. M., Buka, S., Boriel, D. L.,  
680 Bandyopadhyay, S., Kennedy, D. N., Caviness, V. S., Bush, G., Alvardi, M., Hammerness, P., Faraone,  
681 S. V. and Seidman, L. J. (2008) 'Towards further understanding of the co-morbidity between attention  
682 deficit hyperactivity disorder and bipolar disorder: a MRI study of brain volumes', *Psychological  
683 Medicine*, 38(7), pp. 1045–1056. doi: 10.1017/S0033291707001791.
- 684 Boudreau, B. and Poulin, C. (2008) 'An examination of the validity of the Family Affluence Scale II  
685 (FAS II) in a general adolescent population of Canada', *Social Indicators Research*, 94(1), p. 29. doi:  
686 10.1007/s11205-008-9334-4.

- 687 Brass, M., Derrfuss, J., Forstmann, B. U. and von Cramon, D. Y. (2005) ‘The role of the inferior frontal  
688 junction area in cognitive control’, *Trends in Cognitive Sciences*, 9(7), pp. 314–316. doi:  
689 10.1016/j.tics.2005.05.001.
- 690 Brzezicka, A. (2013) ‘Integrative deficits in depression and in negative mood states as a result of  
691 fronto-parietal network dysfunctions.’, *Acta neurobiologiae experimentalis*.
- 692 Bush, G. (2011) ‘Cingulate, Frontal, and Parietal Cortical Dysfunction in Attention-  
693 Deficit/Hyperactivity Disorder’, *Biological Psychiatry*. (Prefrontal Cortical Circuits Regulating  
694 Attention, Behavior and Emotion), 69(12), pp. 1160–1167. doi: 10.1016/j.biopsych.2011.01.022.
- 695 Buzsáki, G. and Moser, E. I. (2013) ‘Memory, navigation and theta rhythm in the hippocampal-  
696 entorhinal system’, *Nature Neuroscience*, 16(2), pp. 130–138. doi: 10.1038/nn.3304.
- 697 Canbeyli, R. (2010) ‘Sensorimotor modulation of mood and depression: An integrative review’,  
698 *Behavioural Brain Research*, 207(2), pp. 249–264. doi: 10.1016/j.bbr.2009.11.002.
- 699 Chambers, C. D., Garavan, H. and Bellgrove, M. A. (2009) ‘Insights into the neural basis of response  
700 inhibition from cognitive and clinical neuroscience’, *Neuroscience and Biobehavioral Reviews*, 33, pp.  
701 631–646. doi: 10.1016/j.neubiorev.2008.08.016.
- 702 [Chong, T. T. J., Williams, M. A., Cunnington, R., & Mattingley, J. B. \(2008\). Selective attention  
703 modulates inferior frontal gyrus activity during action observation. \*Neuroimage\*, 40\(1\), 298-307.](#)
- 704 Christie, G. J. and Tata, M. S. (2009) ‘Right frontal cortex generates reward-related theta-band  
705 oscillatory activity’, *Neuroimage*, 48(2), pp. 415–422.
- 706 Cohen, J., Cohen, R., Adad, J., Cohen, J. M., Cohen, J. A., Mansfield, J. and Cohen, J. B. (1988)  
707 ‘Statistical power analysis for the behavioral sciences’. Available at:  
708 <https://www.scienceopen.com/document?vid=94bc2633-7c1a-41a3-89ee-56e75d596213> (Accessed: 10  
709 April 2020).
- 710 Deckersbach, T., Dougherty, D. D. and Rauch, S. L. (2006) ‘Functional Imaging of Mood and Anxiety  
711 Disorders’, *Journal of Neuroimaging*, 16(1), pp. 1–10. doi: 10.1177/1051228405001474.
- 712 Delorme, A. and Makeig, S. (2004) ‘EEGLAB: an open source toolbox for analysis of single-trial EEG  
713 dynamics including independent component analysis’, *Journal of Neuroscience Methods*, 134(1), pp.  
714 9–21. doi: 10.1016/j.jneumeth.2003.10.009.
- 715 Desikan, R. S., Ségonne, F., Fischl, B., Quinn, B. T., Dickerson, B. C., Blacker, D., Buckner, R. L.,  
716 Dale, A. M., Maguire, R. P., Hyman, B. T., Albert, M. S. and Killiany, R. J. (2006) ‘An automated  
717 labeling system for subdividing the human cerebral cortex on MRI scans into gyral based regions of  
718 interest’, *NeuroImage*, 31(3), pp. 968–980. doi: 10.1016/j.neuroimage.2006.01.021.
- 719 Dosenbach, N. U. F., Fair, D. A., Miezin, F. M., Cohen, A. L., Wenger, K. K., Dosenbach, R. A. T., Fox,  
720 M. D., Snyder, A. Z., Vincent, J. L., Raichle, M. E., Schlaggar, B. L. and Petersen, S. E. (2007)  
721 ‘Distinct brain networks for adaptive and stable task control in humans’, *Proceedings of the National  
722 Academy of Sciences*. National Academy of Sciences, 104(26), pp. 11073–11078. doi:  
723 10.1073/pnas.0704320104.

- 724 Efron, B. (1982). “The Jackknife, the bootstrap, and other resampling plans,” in *CBMS-NSF Regional*  
725 *Conference Series in Applied Mathematics, Monograph 38* (Philadelphia, PA: SIAM). doi:  
726 [10.1137/1.9781611970319](https://doi.org/10.1137/1.9781611970319)
- 727 Ekstrom, A. D., Caplan, J. B., Ho, E., Shattuck, K., Fried, I. and Kahana, M. J. (2005) ‘Human  
728 hippocampal theta activity during virtual navigation’, *Hippocampus*, 15(7), pp. 881–889. doi:  
729 [10.1002/hipo.20109](https://doi.org/10.1002/hipo.20109).
- 730 Eriksen, B. and Eriksen, C. W. (1974) ‘Effects of noise letters upon the identification of a target letter  
731 in a nonsearch task \*’, *Perception & Psychophysics*, 16, pp. 143–149.
- 732 Etkin, A., Gyurak, A. and O’Hara, R. (2013) ‘A neurobiological approach to the cognitive deficits of  
733 psychiatric disorders’, *Dialogues in Clinical Neuroscience*, 15(4), pp. 419–429.
- 734 Gazzaley, A. and Nobre, A. C. (2012) ‘Top-down modulation: Bridging selective attention and working  
735 memory’, *Trends in cognitive sciences*, 16(2), pp. 129–135. doi: [10.1016/j.tics.2011.11.014](https://doi.org/10.1016/j.tics.2011.11.014).
- 736 Genovese, C. R., Lazar, N. A. and Nichols, T. (2002) ‘Thresholding of Statistical Maps in Functional  
737 Neuroimaging Using the False Discovery Rate’, *NeuroImage*, 15(4), pp. 870–878. doi:  
738 [10.1006/nimg.2001.1037](https://doi.org/10.1006/nimg.2001.1037).
- 739 George, M. S., Taylor, J. J. and Short, E. B. (2013) ‘The Expanding Evidence Base for rTMS Treatment  
740 of Depression’, *Current opinion in psychiatry*, 26(1), pp. 13–18. doi:  
741 [10.1097/YCO.0b013e32835ab46d](https://doi.org/10.1097/YCO.0b013e32835ab46d).
- 742 Gray, J. R. (2004) ‘Integration of Emotion and Cognitive Control’, *Current Directions in Psychological*  
743 *Science*, 13, pp. 46–48.
- 744 Greenberg, L. M. and Waldman, I. D. (1993) ‘Developmental normative data on the test of variables of  
745 attention (T.O.V.A.)’, *Journal of Child Psychology and Psychiatry*, 34, pp. 1019–1030.
- 746 Grimm, S., Beck, J., Schuepbach, D., Hell, D., Boesiger, P., Birmopohl, F., Niehaus, L., Boeker, H. and  
747 Northoff, G. (2008) ‘Imbalance between Left and Right Dorsolateral Prefrontal Cortex in Major  
748 Depression Is Linked to Negative Emotional Judgment: An fMRI Study in Severe Major Depressive  
749 Disorder’, *Biological Psychiatry*, 63(4), pp. 369–376. doi: [10.1016/j.biopsych.2007.05.033](https://doi.org/10.1016/j.biopsych.2007.05.033).
- 750 Gudmundsson, S., Runarsson, T. P., Sigurdsson, S., Eiriksdottir, G. and Johnsen, K. (2007) ‘Reliability  
751 of quantitative EEG features’, *Clinical Neurophysiology*, 118(10), pp. 2162–2171. doi:  
752 [10.1016/j.clinph.2007.06.018](https://doi.org/10.1016/j.clinph.2007.06.018).
- 753 Guse, B., Falkai, P. and Wobrock, T. (2010) ‘Cognitive effects of high-frequency repetitive transcranial  
754 magnetic stimulation: a systematic review’, *Journal of Neural Transmission*, 117(1), pp. 105–122. doi:  
755 [10.1007/s00702-009-0333-7](https://doi.org/10.1007/s00702-009-0333-7).
- 756 Haldane, M., & Frangou, S. (2006). Functional neuroimaging studies in mood disorders. *Acta*  
757 *Neuropsychiatrica*, 18(2), 88-99.
- 758 Hampshire, A., Chamberlain, S. R., Monti, M. M., Duncan, J. and Owen, A. M. (2010) ‘The role of the  
759 right inferior frontal gyrus: inhibition and attentional control’, *NeuroImage*, 3(50), pp. 1313–1319. doi:  
760 [10.1016/j.neuroimage.2009.12.109](https://doi.org/10.1016/j.neuroimage.2009.12.109).

- 761 Hedges, L. V. and Olkin, I. (1985) *Statistical methods for meta-analysis*. Academic Press. Available at:  
762 <https://agris.fao.org/agris-search/search.do?recordID=US880855188> (Accessed: 9 May 2020).
- 763 Heeger, D. and Landy, M. (2009) ‘Signal detection theory’, *Encyclopedia of perception*. SAGE  
764 Publications, pp. 887–892.
- 765 Hesslinger, B., Tebartz van Elst, L., Thiel, T., Haegele, K., Hennig, J. and Ebert, D. (2002)  
766 ‘Frontoorbital volume reductions in adult patients with attention deficit hyperactivity disorder’,  
767 *Neuroscience Letters*, 328(3), pp. 319–321. doi: 10.1016/S0304-3940(02)00554-2.
- 768 Holmes, C. J., Hoge, R., Collins, L., Woods, R., Toga, A. W. and Evans, A. C. (1998) ‘Enhancement of  
769 MR Images Using Registration for Signal Averaging’, *Journal of Computer Assisted Tomography*,  
770 22(2), pp. 324–333.
- 771 Hoy, K. E., Bailey, N., Michael, M., Fitzgibbon, B., Rogasch, N. C., Saeki, T. and Fitzgerald, P. B.  
772 (2016) ‘Enhancement of Working Memory and Task-Related Oscillatory Activity Following  
773 Intermittent Theta Burst Stimulation in Healthy Controls’, *Cerebral Cortex*. Oxford Academic, 26(12),  
774 pp. 4563–4573. doi: 10.1093/cercor/bhv193.
- 775 Insel, T., Cuthbert, B., Garvey, M., Heinssen, R., Pine, D. S., Quinn, K., Sanislow, C. and Wang, P.  
776 (2010) ‘Research Domain Criteria (RDoC): Toward a New Classification Framework for Research on  
777 Mental Disorders’, *American Journal of Psychiatry*. American Psychiatric Publishing, 167(7), pp. 748–  
778 751. doi: 10.1176/appi.ajp.2010.09091379.
- 779 Inzlicht, M., Bartholow, B. D. and Hirsh, J. B. (2015) ‘HHS Public Access’, *Trends in cognitive*  
780 *sciences*, 19, pp. 126–132. doi: 10.1016/j.tics.2015.01.004.Emotional.
- 781 [Jung, T. P., Makeig, S., Humphries, C., Lee, T. W., Mckeown, M. J., Iragui, V., & Sejnowski, T. J.](#)  
782 [\(2000\). Removing electroencephalographic artifacts by blind source](#)  
783 [separation. \*Psychophysiology\*, 37\(2\), 163-178.](#)
- 784 Khanna, P. and Carmena, J. M. (2017) ‘Beta band oscillations in motor cortex reflect neural population  
785 signals that delay movement onset’, *eLife*, 6. doi: 10.7554/eLife.24573.
- 786 Kothe, C., Medine, D., Boulay, C., Grivich, M., Stenner, T. (2019) 'Lab Streaming Layer' *Copyright*  
787 <https://labstreaminglayer.readthedocs.io/>  
788
- 789 Kroenke, K., Spitzer, R. L. and Williams, J. B. W. (2001) ‘The PHQ-9: Validity of a Brief Depression  
790 Severity Measure’, *Journal of general internal medicine*, 16, pp. 606–613.
- 791 Lavie, N., Hirst, A. and Fockert, J. W. D. (2004) ‘Load Theory of Selective Attention and Cognitive  
792 Control’, *Journal of Experimental Psychology: General*, 133, pp. 339–354. doi: 10.1037/0096-  
793 3445.133.3.339.
- 794 Lenartowicz, A., Delorme, A., Walshaw, P. D., Cho, A. L., Bilder, R. M., McGough, J. J., McCracken,  
795 J. T., Makeig, S. and Loo, S. K. (2014) ‘Electroencephalography Correlates of Spatial Working  
796 Memory Deficits in Attention-Deficit/Hyperactivity Disorder: Vigilance, Encoding, and Maintenance’,  
797 *Journal of Neuroscience*, 34(4), pp. 1171–1182. doi: 10.1523/JNEUROSCI.1765-13.2014.

- 798 Lenartowicz, A., Kalar, D. J., Congdon, E. and Poldrack, A. (2010) 'Towards an Ontology of Cognitive  
799 Control', *Topics in cognitive science*, 2, pp. 678–692. doi: 10.1111/j.1756-8765.2010.01100.x.
- 800 López-martín, S., Albert, J., Fernández-jaén, A. and Carretié, L. (2013) 'Emotional distraction in boys  
801 with ADHD: Neural and behavioral correlates', *Brain and cognition*, 83, pp. 10–20. doi:  
802 10.1016/j.bandc.2013.06.004.
- 803 López-Martín, S., Albert, J., Fernández-Jaén, A. and Carretié, L. (2015) 'Emotional response inhibition  
804 in children with attention-deficit/hyperactivity disorder: neural and behavioural data', *Psychological  
805 Medicine*, 45, pp. 2057–2071. doi: 10.1017/S0033291714003195.
- 806 Luna, B., Marek, S., Larsen, B., Tervo-Clemmens, B. and Chahal, R. (2015) 'An integrative model of  
807 the maturation of cognitive control', *Annual review of neuroscience*, 38, pp. 151–170. doi:  
808 10.1126/science.1249098.Sleep.
- 809 Makeig, S., Westerfield, M., Jung, T.-P., Enghoff, S., Townsend, J., Courchesne, E. and Sejnowski, T. J.  
810 (2002) 'Dynamic Brain Sources of Visual Evoked Responses', *Science*. American Association for the  
811 Advancement of Science, 295(5555), pp. 690–694. doi: 10.1126/science.1066168.
- 812 Massat, I., Slama, H., Kavec, M., Linotte, S., Mary, A., Baleriaux, D., Metens, T., Mendlewicz, J. and  
813 Peigneux, P. (2012) 'Working Memory-Related Functional Brain Patterns in Never Medicated Children  
814 with ADHD', *PLoS ONE*, 7(11). doi: 10.1371/journal.pone.0049392.
- 815 McEvoy, L. (2000) 'Test-retest reliability of cognitive EEG', *Clin Neurophysiol*, 111, pp. 457–463. doi:  
816 10.1016/S1388-2457(99)00258-8.
- 817 McNaughton, N. (1997) 'Cognitive Dysfunction Resulting from Hippocampal Hyperactivity—A  
818 Possible Cause of Anxiety Disorder?', *Pharmacology Biochemistry and Behavior*, 56(4), pp. 603–611.  
819 doi: 10.1016/S0091-3057(96)00419-4.
- 820 Menon, V. and Uddin, L. Q. (2010) 'Saliency, switching, attention and control: a network model of  
821 insula function', *Brain structure & function*, 214(5–6), pp. 655–667. doi: 10.1007/s00429-010-0262-0.
- 822 Mensen, A., Gorban, C., Niklaus, M., Kuske, E. and Khatami, R. (2014) 'The effects of theta-burst  
823 stimulation on sleep and vigilance in humans', *Frontiers in Human Neuroscience*. Frontiers, 8. doi:  
824 10.3389/fnhum.2014.00420.
- 825 Millan, M. J., Agid, Y., Brüne, M., Bullmore, E. T., Carter, C. S., Clayton, N. S., Connor, R., Davis, S.,  
826 Deakin, B., DeRubeis, R. J., Dubois, B., Geyer, M. A., Goodwin, G. M., Gorwood, P., Jay, T. M., Joëls,  
827 M., Mansuy, I. M., Meyer-Lindenberg, A., Murphy, D., Rolls, E., Saletu, B., Spedding, M., Sweeney,  
828 J., Whittington, M. and Young, L. J. (2012) 'Cognitive dysfunction in psychiatric disorders:  
829 characteristics, causes and the quest for improved therapy', *Nature Reviews Drug Discovery*. Nature  
830 Publishing Group, 11(2), pp. 141–168. doi: 10.1038/nrd3628.
- 831 Misra, A., Ojeda, A., Mishra, J. (2018) 'BrainE: a digital platform for evaluating, engaging and  
832 enhancing brain function', *Regents of the University of California Copyright* SD2018-816.  
833
- 834 Mishra, J. (2019) 'Translating Science to our global communities', *Elephant in the Lab*  
835 doi.org/10.5281/zenodo.2619955. 2019

- 836 Mishra, J., Anguera, J. A., Ziegler, D. A. and Gazzaley, A. (2013) ‘A Cognitive Framework for  
837 Understanding and Improving Interference Resolution in the Brain’, *Progress in brain research*, 207,  
838 pp. 351–377. doi: 10.1016/B978-0-444-63327-9.00013-8.
- 839 Mishra, J., Martinez, A., Schroeder, C. E. and Hillyard, S. A. (2012) ‘Spatial Attention Boosts Short-  
840 Latency Neural Responses in Human Visual Cortex’, *NeuroImage*, 59(2), pp. 1968–1978. doi:  
841 10.1016/j.neuroimage.2011.09.028.
- 842 Mishra, J., de Villers-Sidani, E., Merzenich, M. and Gazzaley, A. (2014) ‘Adaptive training diminishes  
843 distractibility in aging across species’, *Neuron*, 84(5), pp. 1091–1103.
- 844 Nee, D. E., Brown, J. W., Askren, M. K., Berman, M. G., Demiralp, E., Krawitz, A. and Jonides, J.  
845 (2013) ‘A Meta-analysis of Executive Components of Working Memory’, *Cerebral Cortex*, 23(2), pp.  
846 264–282. doi: 10.1093/cercor/bhs007.
- 847 van Noordt, S. and Segalowitz, S. J. (2012) ‘Performance monitoring and the medial prefrontal cortex:  
848 a review of individual differences and context effects as a window on self-regulation’, *Frontiers in*  
849 *Human Neuroscience*. Frontiers, 6. doi: 10.3389/fnhum.2012.00197.
- 850 [Nunez, P. L. \(2010\). REST: a good idea but not the gold standard. \*Clinical neurophysiology: official\*  
851 \*journal of the International Federation of Clinical Neurophysiology\*, 121\(12\), 2177.](#)
- 852 Oberman, L., Edwards, D., Eldaief, M. and Pascual-Leone, A. (2011) ‘Safety of theta burst transcranial  
853 magnetic stimulation: a systematic review of the literature’, *Journal of Clinical Neurophysiology*,  
854 28(1), p. 67.
- 855 Ojeda, A., Klug, M., Kreutz-Delgado, K., Gramann, K. and Mishra, J. (2019) ‘A Bayesian framework  
856 for unifying data cleaning, source separation and imaging of electroencephalographic signals’, *bioRxiv*.  
857 Cold Spring Harbor Laboratory, p. 559450. doi: 10.1101/559450v3.
- 858 Ojeda, A., Kreutz-Delgado, K. and Mullen, T. (2018) ‘Fast and robust Block-Sparse Bayesian learning  
859 for EEG source imaging’, *Neuroimage*, 174, pp. 449–462.
- 860 Okon-Singer, H., Hendler, T., Pessoa, L. and Shackman, A. J. (2015) ‘The neurobiology of emotion–  
861 cognition interactions: fundamental questions and strategies for future research’, *Frontiers in Human*  
862 *Neuroscience*. Frontiers, 9. doi: 10.3389/fnhum.2015.00058.
- 863 Palva, S. and Palva, J. M. (2007) ‘New vistas for  $\alpha$ -frequency band oscillations’, *Trends in*  
864 *Neurosciences*, 30(4), pp. 150–158. doi: 10.1016/j.tins.2007.02.001.
- 865 Pascual-Marqui, R. D., Michel, C. M. and Lehmann, D. (1994) ‘Low resolution electromagnetic  
866 tomography: A new method for localizing electrical activity in the brain’, *International Journal of*  
867 *Psychophysiology*. Netherlands: Elsevier Science, 18(1), pp. 49–65. doi: 10.1016/0167-8760(84)90014-  
868 X.
- 869 Pessoa, L. (2009) ‘How do emotion and motivation direct executive control?’, *Cell*, 13, pp. 160–166.  
870 doi: 10.1016/j.tics.2009.01.006.



- 871 Pfurtscheller, G. (1999) ‘EEG event - related desynchronization (ERD) and event - related  
872 synchronization (ERS).’, *Electroencephalography: Basic Principles, Clinical Applications and  
873 Related Fields*. Clinical Applications and Related Fields 4th Edition, pp. 958–967.
- 874 Picazio, S., Veniero, D., Ponzio, V., Caltagirone, C., Gross, J., Thut, G. and Koch, G. (2014) ‘Prefrontal  
875 Control over Motor Cortex Cycles at Beta Frequency during Movement Inhibition’, *Current Biology*,  
876 24(24), pp. 2940–2945. doi: 10.1016/j.cub.2014.10.043.
- 877 Posner, M. I. and Rothbart, M. K. (2009) ‘Toward A Physical Basis of Attention and Self Regulation’,  
878 *Physics of life reviews*, 6(2), pp. 103–120. doi: 10.1016/j.plrev.2009.02.001.
- 879 [Price, J. L., & Drevets, W. C. \(2012\). Neural circuits underlying the pathophysiology of mood  
880 disorders. \*Trends in cognitive sciences\*, 16\(1\), 61-71.](#)
- 881 Reinholdt-Dunne, M. L., Mogg, K. and Bradley, B. P. (2013) ‘Attention control: Relationships between  
882 self-report and behavioural measures, and symptoms of anxiety and depression’, *Cognition and  
883 Emotion*. Routledge, 27(3), pp. 430–440. doi: 10.1080/02699931.2012.715081.
- 884 Rossi, S., Hallett, M., Rossini, P. M. and Pascual-Leone, A. (2009) ‘Safety, ethical considerations, and  
885 application guidelines for the use of transcranial magnetic stimulation in clinical practice and research’,  
886 *Clinical Neurophysiology*, 120(12), pp. 2008–2039. doi: 10.1016/j.clinph.2009.08.016.
- 887 Rossi, S., Hallett, M., Rossini, P. M., Pascual-Leone, A. and Safety of TMS Consensus Group (2009)  
888 ‘Safety, ethical considerations, and application guidelines for the use of transcranial magnetic  
889 stimulation in clinical practice and research’, *Clinical Neurophysiology*, 120(12), pp. 2008–2039.
- 890 Sadaghiani, S., Dombert, P. L., Løvstad, M., Funderud, I., Meling, T. R., Endestad, T., Knight, R. T.,  
891 Solbakk, A.-K. and D’Esposito, M. (2019) ‘Lesions to the Fronto-Parietal Network Impact Alpha-Band  
892 Phase Synchrony and Cognitive Control’, *Cerebral Cortex*. Oxford Academic, 29(10), pp. 4143–4153.  
893 doi: 10.1093/cercor/bhy296.
- 894 Sadaghiani, S., Scheeringa, R., Lehongre, K., Morillon, B., Giraud, A.-L., D’Esposito, M. and  
895 Kleinschmidt, A. (2012) ‘Alpha-Band Phase Synchrony Is Related to Activity in the Fronto-Parietal  
896 Adaptive Control Network’, *Journal of Neuroscience*. Society for Neuroscience, 32(41), pp. 14305–  
897 14310. doi: 10.1523/JNEUROSCI.1358-12.2012.
- 898 Shipstead, Z., Harrison, T. L. and Engle, R. W. (2012) ‘Working memory capacity and visual attention:  
899 Top-down and bottom-up guidance’, *Quarterly Journal of Experimental Psychology*, 65, pp. 401–407.  
900 doi: 10.1080/17470218.2012.655698.
- 901 Siegle, G. J., Thompson, W., Carter, C. S., Steinhauer, S. R. and Thase, M. E. (2007) ‘Increased  
902 Amygdala and Decreased Dorsolateral Prefrontal BOLD Responses in Unipolar Depression: Related  
903 and Independent Features’, *Biological Psychiatry*, 61(2), pp. 198–209. doi:  
904 10.1016/j.biopsych.2006.05.048.
- 905 Song, S., Zilverstand, A., Song, H., Uquillas, F. d’Oleire, Wang, Y., Xie, C., Cheng, L. and Zou, Z.  
906 (2017) ‘The influence of emotional interference on cognitive control: A meta-analysis of neuroimaging  
907 studies using the emotional Stroop task’, *Scientific Reports*. Nature Publishing Group, 7(1), pp. 1–9.  
908 doi: 10.1038/s41598-017-02266-2.

- 909 Spearman, C. (1904) “‘The proof and measurement of association between two things’”. Available at:  
910 <https://www.scienceopen.com/document?vid=1b6909e5-63d2-43b0-a160-84f677829b20> (Accessed: 10  
911 April 2020).
- 912 Spitzer, R. L., Kroenke, K., Williams, J. B. W. and Loewe, B. (2006) ‘A Brief Measure for Assessing  
913 Generalized Anxiety Disorder: The GAD-7’, *Archives of internal medicine*, 166, pp. 1092–1097.
- 914 Sternberg, S. (1966) ‘High-speed scanning in human memory’, *science*, 153, pp. 652–654.
- 915 Sylvester, C. M., Corbetta, M., Raichle, M. E., Rodebaugh, T. L., Schlaggar, B. L., Sheline, Y. I.,  
916 Zorumski, C. F. and Lenze, E. J. (2012) ‘Functional network dysfunction in anxiety and anxiety  
917 disorders’, *Trends in Neurosciences*, 35(9), pp. 527–535. doi: 10.1016/j.tins.2012.04.012.
- 918 Tettamanti, M., Manenti, R., Della Rosa, P. A., Falini, A., Perani, D., Cappa, S. F. and Moro, A. (2008)  
919 ‘Negation in the brain: Modulating action representations’, *NeuroImage*, 43(2), pp. 358–367. doi:  
920 10.1016/j.neuroimage.2008.08.004.
- 921 Thai, N., Taber-Thomas, B. C. and Pérez-Edgar, K. E. (2016) ‘Neural correlates of attention biases,  
922 behavioral inhibition, and social anxiety in children: An ERP study’, *Developmental Cognitive  
923 Neuroscience*, 19, pp. 200–210. doi: 10.1016/j.dcn.2016.03.008.
- 924 Thimm, A. and Funke, K. (2015) ‘Multiple blocks of intermittent and continuous theta-burst  
925 stimulation applied via transcranial magnetic stimulation differently affect sensory responses in rat  
926 barrel cortex’, *The Journal of Physiology*, 593(4), pp. 967–985. doi: 10.1113/jphysiol.2014.282467.
- 927 Tottenham, N., Tanaka, J. W., Leon, A. C., McCarry, T., Nurse, M., Hare, T. A., Marcus, D. J.,  
928 Westerlund, A., Casey, B. J. and Nelson, C. (2009) ‘The NimStim set of facial expressions: Judgments  
929 from untrained research participants’, *Psychiatry Research*, 168, pp. 242–249. doi:  
930 10.1016/j.psychres.2008.05.006.
- 931 Vandierendonck, A. (2017) ‘A comparison of methods to combine speed and accuracy measures of  
932 performance: A rejoinder on the binning procedure’, *Behavior Research Methods*, 49(2), pp. 653–673.  
933 doi: 10.3758/s13428-016-0721-5.
- 934 Vékony, T., Németh, V. L., Holczer, A., Kocsis, K., Kincses, Z. T., Vécsei, L. and Must, A. (2018)  
935 ‘Continuous theta-burst stimulation over the dorsolateral prefrontal cortex inhibits improvement on a  
936 working memory task’, *Scientific Reports*, 8. doi: 10.1038/s41598-018-33187-3.
- 937 Verbruggen, F., Aron, A. R., Stevens, M. A. and Chambers, C. D. (2010) ‘Theta burst stimulation  
938 dissociates attention and action updating in human inferior frontal cortex’, *Proceedings of the National  
939 Academy of Sciences*. National Academy of Sciences, 107(31), pp. 13966–13971. doi:  
940 10.1073/pnas.1001957107.
- 941 Viejo-Sobera, R., Redolar-Ripoll, D., Boixadós, M., Palaus, M., Valero-Cabré, A. and Marron, E. M.  
942 (2017) ‘Impact of Prefrontal Theta Burst Stimulation on Clinical Neuropsychological Tasks’, *Frontiers  
943 in Neuroscience*, 11. doi: 10.3389/fnins.2017.00462.
- 944 W, P. (2005) ‘Toward establishing a therapeutic window for rTMS by theta burst stimulation.’, *Neuron*,  
945 45(2), pp. 181–183. doi: 10.1016/j.neuron.2005.01.008.

- 946 Waugh, C. E., Lemus, M. G. and Gotlib, I. H. (2014) ‘The role of the medial frontal cortex in the  
947 maintenance of emotional states’, *Social Cognitive and Affective Neuroscience*, 9(12), pp. 2001–2009.  
948 doi: 10.1093/scan/nsu011.
- 949 Wodka, E. L., Mahone, E. M., Blankner, J. G., Larson, J. C. G., Fotedar, S., Denckla, M. B. and  
950 Mostofsky, S. H. (2007) ‘Evidence that response inhibition is a primary deficit in ADHD’, *Journal of*  
951 *Clinical and Experimental Neuropsychology*. Routledge, 29(4), pp. 345–356. doi:  
952 10.1080/13803390600678046.
- 953 Zanto, T. P., Rubens, M. T., Thangavel, A. and Gazzaley, A. (2011) ‘Causal role of the prefrontal cortex  
954 in top-down modulation of visual processing and working memory’, *Nature neuroscience*, 14(5), pp.  
955 656–661. doi: 10.1038/nn.2773.
- 956 Zavala, B., Jang, A., Trotta, M., Lungu, Codrin I., Brown, P. and Zaghoul, K. A. (2018) ‘Cognitive  
957 control involves theta power within trials and beta power across trials in the prefrontal-subthalamic  
958 network’, *Brain: A Journal of Neurology*, 141(12), pp. 3361–3376. doi: 10.1093/brain/awy266.
- 959 Zavala, B., Jang, A., Trotta, M., Lungu, Codrin I., Brown, P. and Zaghoul, K. A. (2018) ‘Cognitive  
960 control involves theta power within trials and beta power across trials in the prefrontal-subthalamic  
961 network’, *Brain*, 141(12), pp. 3361–3376. doi: 10.1093/brain/awy266.
- 962 Zhao, X.-H., Wang, P.-J., Li, C.-B., Hu, Z.-H., Xi, Q., Wu, W.-Y. and Tang, X.-W. (2007) ‘Altered  
963 default mode network activity in patient with anxiety disorders: An fMRI study’, *European Journal of*  
964 *Radiology*. (Prostate), 63(3), pp. 373–378. doi: 10.1016/j.ejrad.2007.02.006.
- 965  
966

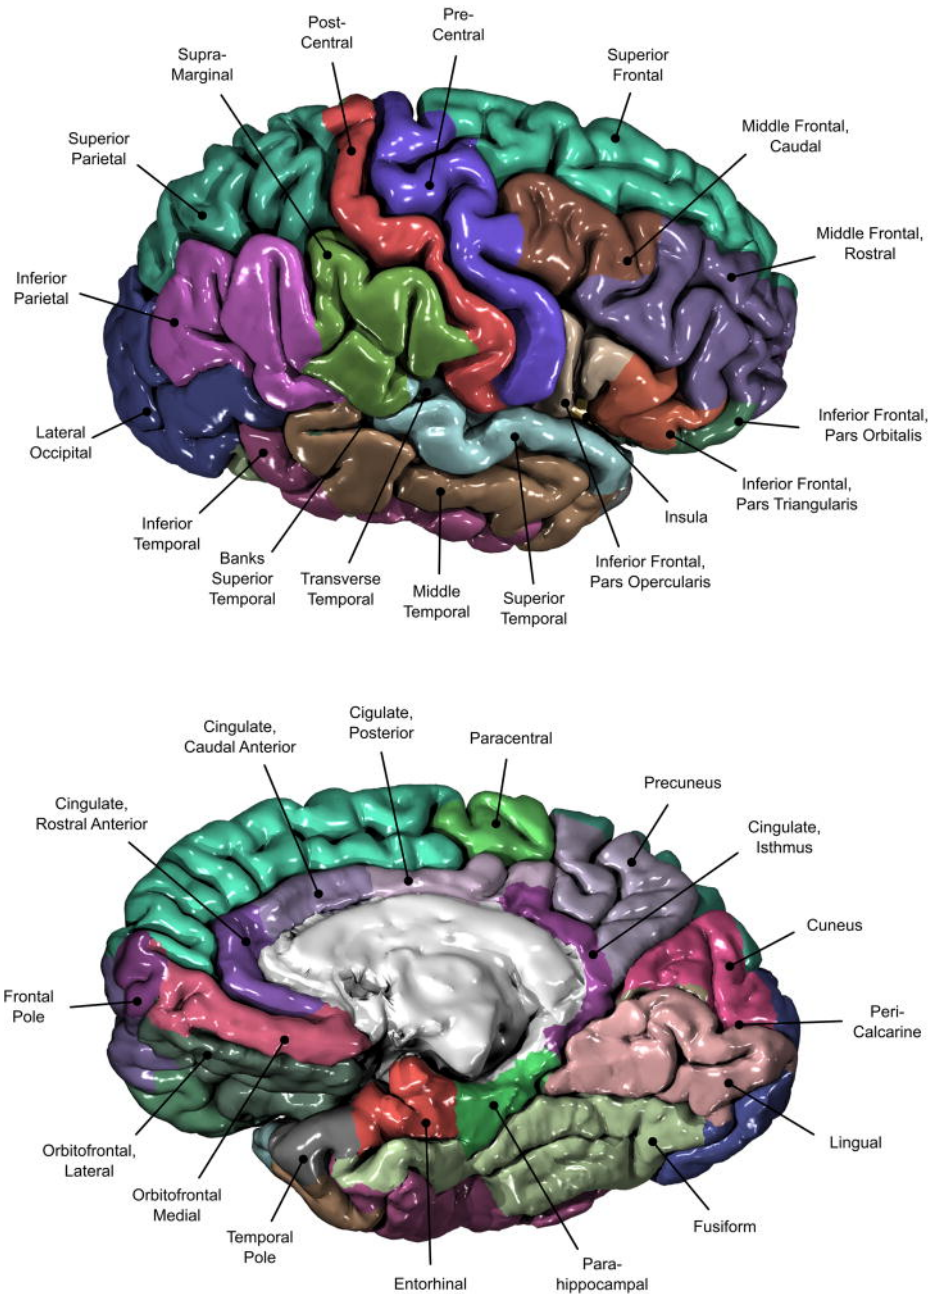

967  
968  
969  
970  
971

**Supplementary Figure 1.** Cortical source regions as per the Desikan-Killiany atlas (Desikan *et al.*, 2006).

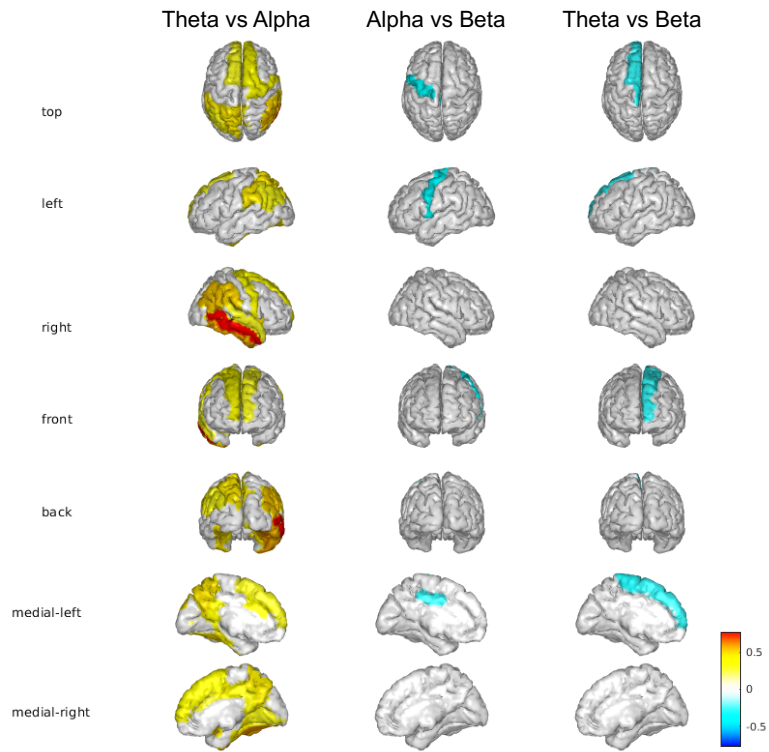

972  
973  
974  
975  
976  
977  
978  
979  
980  
981

**Supplementary Figure 2.** Significant correlations between the theta, alpha and beta band global cognitive task-average maps are shown (Pearson correlations,  $r(96)$  at  $p < 0.01$ ).

982

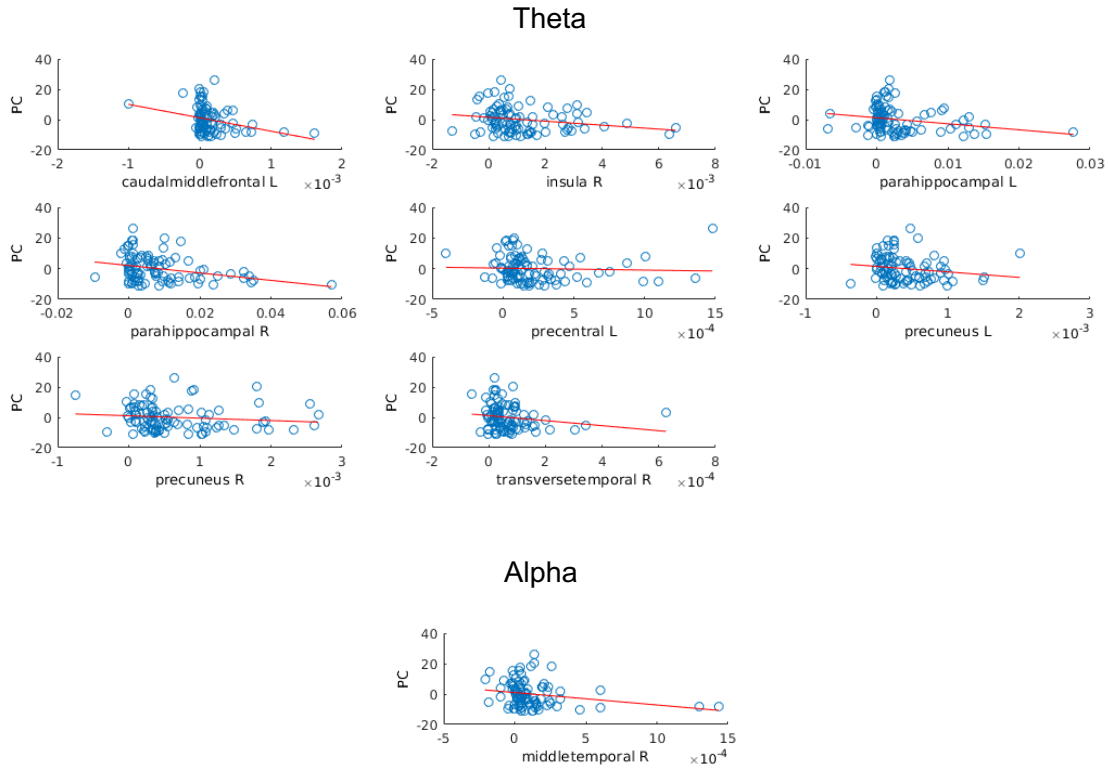

983

984

985

986

987

988

**Supplementary Figure 3.** Neural symptom correlations. Significant correlations between the theta and alpha band global cognitive task-average activations and the top principal mental health symptom component (PC) are shown (Spearman correlations,  $p < 0.05$ , fdr-corrected for multiple comparisons across ROIs and frequencies).
